# Supplementary material for: Topsentinol L Trisulfate, a Marine Natural Product That Targets Basal-like and Claudin-Low Breast Cancers
Source: PubMed Central journal article supplement (PMC7831112; doi:10.3390/md19010041), 2021-01-18
Supplement: marinedrugs-19-00041-s001.pdf [file marinedrugs-19-00041-s001.pdf]

## *Supplementary Material for*

# **Topsentinol L Trisulfate, a new Marine Natural Product, that Targets Basal-like and Claudin-low Breast Cancers**

**Authors:** Nader N. El-Chaar, Thomas E. Smith, Gajendra Shrestha, Stephen R. Piccolo, Mary Kay Harper, Ryan M. Van Wagoner, Zhenyu Lu, Ashlee R. Venancio, Chris M. Ireland, Andrea H. Bild, Philip J. Moos

## **1 Supplementary Methods**

### **1.1 Small Molecules**

Dorsomorphin and Ly2603618 were purchased from Selleckchem and dissolved in water and 100% DMSO respectively. Dorsomorphin was prepared as a stock of 100 mM, while Ly2603618 was prepared as a 28.65 mM stock.

### **1.2 Adenoviruses**

CHK1 adenovirus was purchased from Vector Biolabs (Philadelphia, PA). GFP adenovirus was previously described (1). AMPK (constitutively-active) was a generous donation from Dr. Kenneth Walsh at Boston University.

### **1.3 Large-scale Isolation and Purification of Active Compound**

Frozen PNG07-3-073 *Topsentia* sp. sponge (215 g) was extracted three times with methanol. One half of the pooled methanol extract was fractionated on Diaion HP20SS resin, eluting with water/isopropanol mixtures in 25% increments, followed by 100% methanol to yield five fractions, FW and F1-F4, where F2 was the only fraction that exhibited tumoricidal properties. F2 (50/50 IPA/H<sub>2</sub>O, 98 mg) was subjected to C<sub>18</sub> flash chromatography, eluting with 40-100% methanol in water in 10% increments, yielding 46 subfractions, of which only subfractions 22, 23, 24 and 25 showed tumoricidal activity. Bioactive fractions 22-25 were combined (65 mg) and further fractionated by HPLC using a Luna 5  $\mu$ m phenylhexyl column (250 x 4.6 mm) and a gradient of acetonitrile (ACN) with 0.2 M NaCl (36% ACN increasing over 4 min to 43% ACN, held for 11 min, then decreased to 36% ACN over 2 min) to yield isolate 1 (sharp peak, RT=9.57 min, 13.4mg) and isolate 2 (broad peak, RT=10.2 min, 6.3mg). Salt was removed by loading samples onto pre-equilibrated Waters Sep-Pak C18 cartridges and flushing with three column volumes of 10% methanol, followed by compound elution with 100% methanol. The structures of the compounds were defined using MS and NMR with the primary changes being resonances for the side chain. In particular, the structure of isolate-1 was determined by NMR analysis to be identical to halistanol sulfate and was verified by HRESIMS ( $m/z$  = 607.2958 [M-SO<sub>3</sub>-H]<sup>-</sup>, calculated for C<sub>29</sub>H<sub>51</sub>O<sub>9</sub>S<sub>2</sub>, 607.2980,  $\Delta$  = -3.9 ppm) (2). Analysis of spectral data for isolate 2 indicated that it had the same structure as topsentinol L (3) with sulfate groups located at positions C-2, C-3, and C-6. We have named this compound topsentinol L trisulfate (TLT): White solid,  $[\alpha]_D^{20} +12.0$  (c 0.212, MeOH); UV (MeOH)  $\lambda_{max}$  (log e) 215 nm (2.98); <sup>1</sup>H and <sup>13</sup>C NMR (Supplemental Table 3); high-resolution electrospray ionization mass spectrometry (HRESIMS)  $m/z$  619.2971 [M-SO<sub>3</sub>-H]<sup>-</sup> (calculated for C<sub>30</sub>H<sub>51</sub>O<sub>9</sub>S<sub>2</sub>, 619.2980;  $\Delta$  -1.5 ppm).

### **1.4 Cell Lysis and Western Blotting**

Cell lines were washed once with ice-cold PBS (1x) and then lysed in a buffer containing 1% Triton X-100, 50mM HEPES, pH 7.4, 150mM NaCl, 1.5mM MgCl<sub>2</sub>, 1mM EGTA, 100mM NaF, 10mM Na pyrophosphate, 1mM Na<sub>3</sub>VO<sub>4</sub>, 10% glycerol, and protease inhibitors (P8340) added fresh from Sigma-Aldrich (St Louis, Missouri). Lysates were then incubated on ice for 15 minutes with agitation every two minutes and then centrifuged at 14,000 RPMs in 4 °C. Protein yield was quantified using the Bradford reagent (Amresco, Solon, OH) and denatured by boiling and SDS treatment (with beta-mercaptoethanol). Equivalent amounts of protein (approximately 30 µg) were resolved on 12% precast SDS-PAGE gels (Biorad, Hercules, CA) and transferred to Immun-blot PVDF membrane (Biorad, Hercules, CA). IgG HRP-linked Secondary antibodies were used from GE Lifesciences (Pittsburgh, PA). Western blots were developed using SuperSignal West Dura Substrate (Thermoscientific, Rockford, IL).

### 1.5 Adenovirus-infected Dose Response Assays

Cell lines HCC1143 and MDA-MB-436 were infected with adenovirus expressing GFP, AMPK, CHK1, or with AMPK and CHK1 adenoviruses simultaneously with a multiplicity of infection (MOI) of 150 and left overnight. Cell lines were then plated 1000-2000 cells/well in 384-well plates in 5% FBS and treated with TLT for 72 hrs. TLT was dosed by serially diluting 1:2 starting from 104.4 µM to the lowest dose of 3.26 µM. Cell viability was measured as described in the “Cell lines and Viability Measurement” subsection. Doses were repeated in quadruplicates and averaged out for a single value. Dose-response curves were plotted and EC50 values calculated as described in the “Dose-Response Assays” subsection.

## 2 Supplementary Figures and Tables

### 2.1 Supplementary Figures

**Supplementary Figure 1: Image of the marine invertebrate *Topsentia* sp. sponge labeled PNG07-3-073.** The sponge specimen PNG07-3-073 was identified as *Topsentia* sp. (OTU UU1273), order Halichondrida, family Halichondriidae. The creamy white sponge is massive with thick fistular processes, a firm texture, and a slightly hispid surface. The ectosome is not detachable, consisting of a thin paratangential layer of spicules with protruding choanosomal spicules. The interior of the sponge is densely spiculose and completely disorganized with plumose bundles of spicules just below the surface, spongin not visibly present. The spicules are fusiform oxea in a range of sizes and widths, generally in categories: ~1125-1325 × 42-48µm, 715-1050 × 25µm, 525-825 × 15µm. *Topsentia* sp. (OTU UU1273) does not compare entirely to previously described species of *Topsentia* and likely represents an undescribed species. The sponge was collected by SCUBA November 21, 2007 from New Britain, Papua New Guinea (S 05° 19.680', E 150° 17.674') and immediately frozen. **The specimen has been described in** SpongeMaps, available at the following link: <http://www.spongemaps.org/#!/Topsentia-sp-OTU-UU1273-demosponge/zoom/c21kz/imagel3v>

**Supplementary Figure 2: 1D NMR spectra for halistanol sulfate and topsentinol L trisulfate in CD<sub>3</sub>OD.** 1D NMR spectra for halistanol sulfate in CD<sub>3</sub>OD, (A) <sup>1</sup>H spectrum (B) <sup>13</sup>C spectrum, and topsentinol L trisulfate in CD<sub>3</sub>OD, (C) <sup>1</sup>H spectrum (D) <sup>13</sup>C spectrum.

**Supplementary Figure 3: Low-resolution mass spectra for halistanol sulfate and topsentinol L trisulfate.** Low-resolution mass spectra for (A) halistanol sulfate and (B) topsentinol L trisulfate.

**Supplementary Figure 4: 2D NMR spectra for topsentinol L trisulfate in CD<sub>3</sub>OD.** 2D NMR spectra for topsentinol L trisulfate in CD<sub>3</sub>OD, (A) gCOSY spectrum, (B) zTOCSY spectrum, (C) ROESY spectrum, (D) gHSQC spectrum, (E) gHMBC spectrum.

**Supplementary Figure 5: Halistanol sulfate is not selective against BL-CL in comparison to Luminal/HER2+ breast cancer.** The cell lines of the investigated breast cancer panel were divided accordingly and scatter dot plot diagrams of halistanol sulfate EC50 values plotted. Every dot represents a cell line, with the y value representing the cell line's halistanol sulfate compound EC50 and the horizontal line indicating the mean value for every group. There is no significant difference between the response of BL-CL and Luminal/HER2+ cell lines to halistanol sulfate.

**Supplementary Figure 6: Overexpression of AMPK and CHK1 individually or concurrently sensitizes BL-CL cell lines to TLT treatment.** BL-CL cell line (A) HCC1143 and (B) MDA-MB-436 were infected with adenovirus vectors expressing GFP, CHK1, AMPK or AMPK+CHK1 with a multiplicity of infection (MOI) of 150 overnight. Afterward, a dose-response assay with TLT was performed and response curves plotted. The x-axis indicated the log<sub>10</sub> dose of TLT. Y-axis indicates the percent response as compared to vehicle control (DMSO). The more the curves are skewed to the left, the more sensitive they are to TLT treatment. Green = GFP, Blue = CHK1, Black = AMPK+CHK1, Red = AMPK.

## 2.2 Supplementary Tables

**Supplementary Table 1: Characteristics of the breast and lung cancer cell lines used in the study for all screens and drug response assays.** The characteristics of all the cell lines used in this study are described in this table. For lung cancer cell lines, a description of EGFR, p53 and KRAS mutations exists. This information is portrayed by the specific amino acid mutations and frameshift deletions observed in their respective proteins where "\*" denotes a stop codon.

**Supplementary Table 2: List of cell lines used for each drug screen.** Cell lines that were part of particular screens have an "x" in the corresponding screen column.

**Supplementary Table 3: <sup>13</sup>C and <sup>1</sup>H chemical shifts of halistanol sulfate and topsentinol L trisulfate in CD<sub>3</sub>OD.** δ<sub>H</sub> (500 MHz) and δ<sub>C</sub> (125 MHz) NMR data for halistanol sulfate and topsentinol L trisulfate in CD<sub>3</sub>OD.

**Supplementary Table 4: RPPA results of the 8 BL-CL cell lines treated with DMSO or TLT.** The RPPA normalized linear results of all the 217 proteins screened post-DMSO or TLT 6 hrs treatment. The scores represent normalized linear values. Pink indicates proteins significantly deregulated by TLT treatment (Paired t-test). Orange indicates proteins exhibiting a downregulation or upregulation of 15% or more. 21 proteins exhibited a 15% or more upregulation or downregulation in protein level (orange), with only eight of these proteins exhibiting statistically significant changes (orange and pink).

**Supplementary Table 5: TLT EC50 decreases with overexpression of CHK1 and/or AMPK.** A table summarizing TLT EC50 (μM) is provided for each cell line following adenovirus-mediated overexpression of GFP, AMPK, CHK1 or AMPK+CHK1.

**REFERENCES**

1. Bild AH, Yao G, Chang JT, Wang Q, Potti A, Chasse D, et al. Oncogenic pathway signatures in human cancers as a guide to targeted therapies. *Nature* 2006;439(7074):353-7.
2. Fusetani N, Matsunaga S, Konosu S. Bioactive marine metabolites II. Halistanol sulfate, as antimicrobial novel steroid sulfate from the marine sponge *Halichondria cf. moorei* Bergquist. *Tetrahedron Lett* 1981;22(1985-1988).
3. Dai J, Sorribas A, Yoshida WY, Kelly M, Williams PG. Topsentinols, 24-isopropyl steroids from the marine sponge *Topsentia* sp. *Journal of natural products* 2010;73(9):1597-600.

Supplementary Figure 1

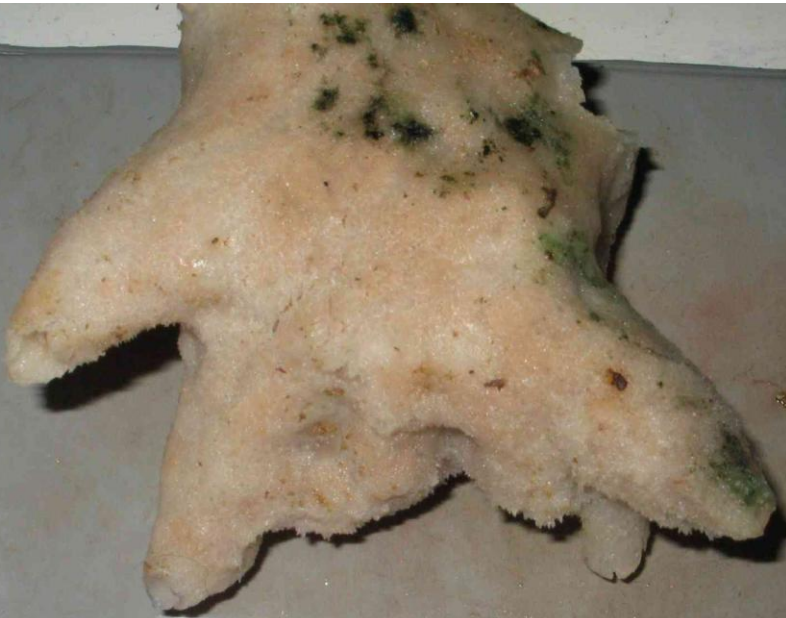

PN607  
3-073

Supplementary Figure 2A

A

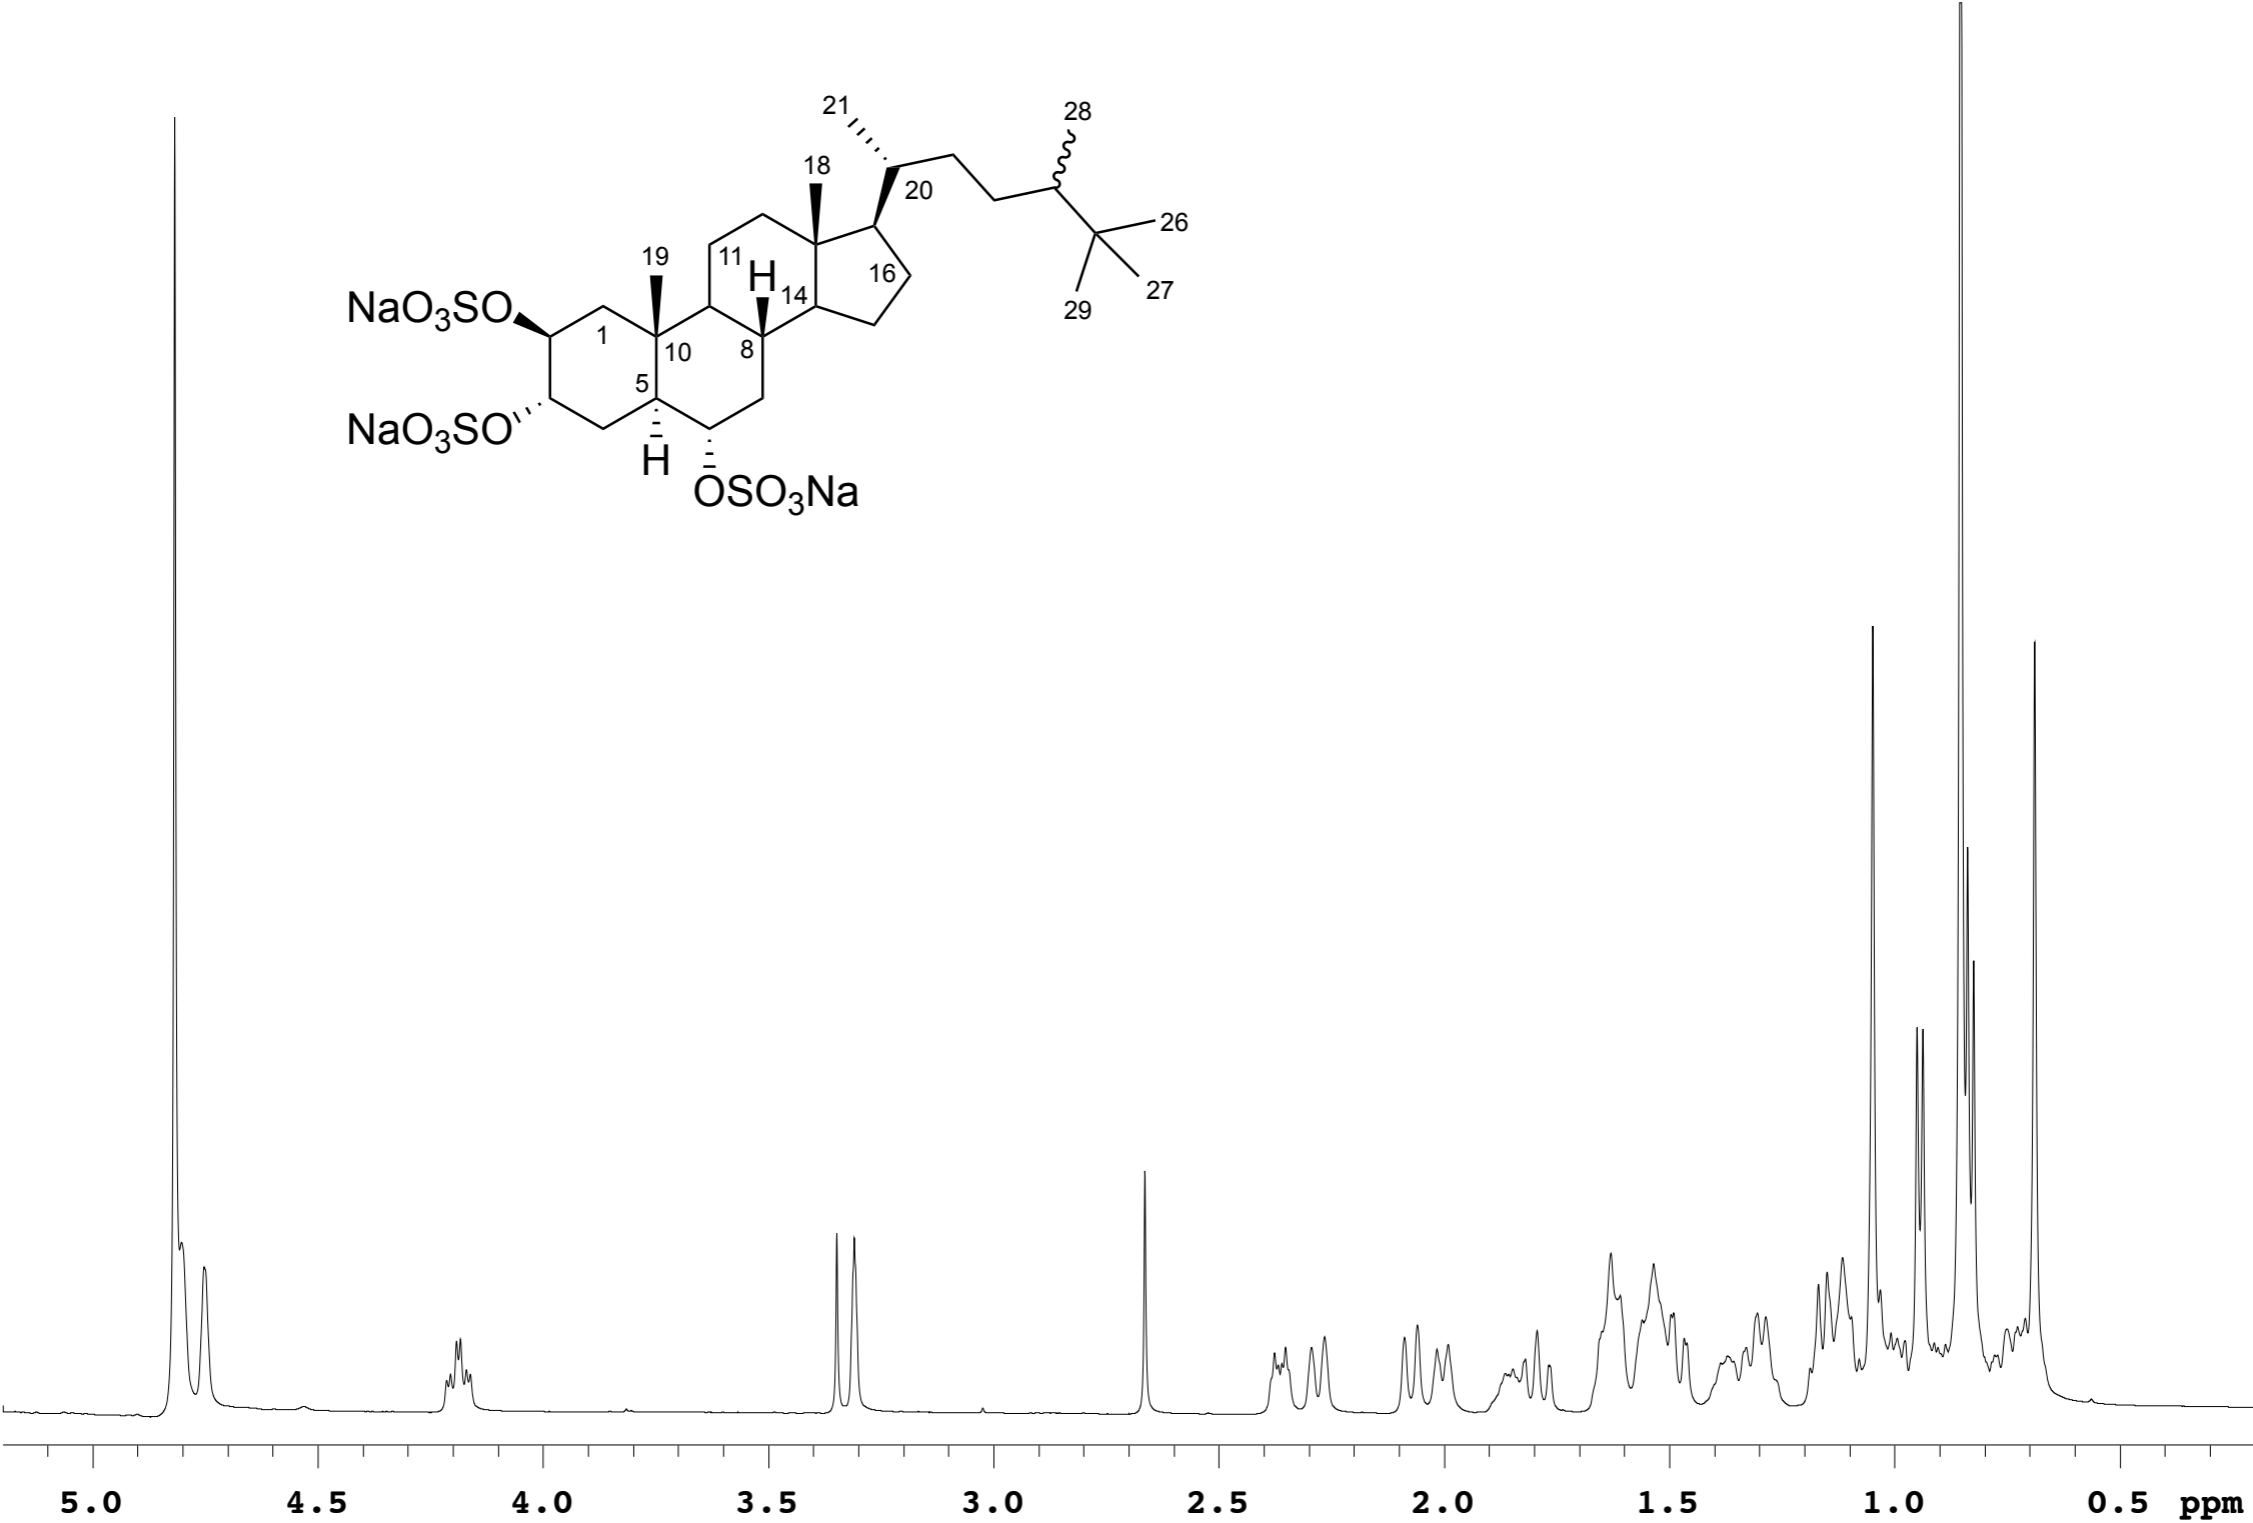

Supplementary Figure 2B

B

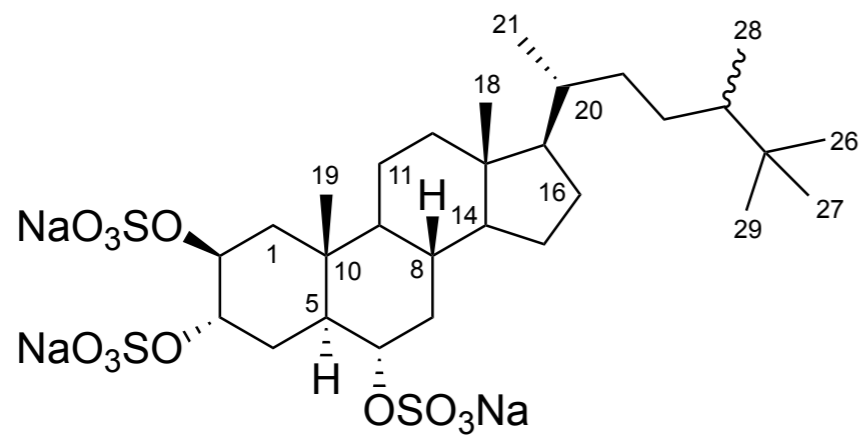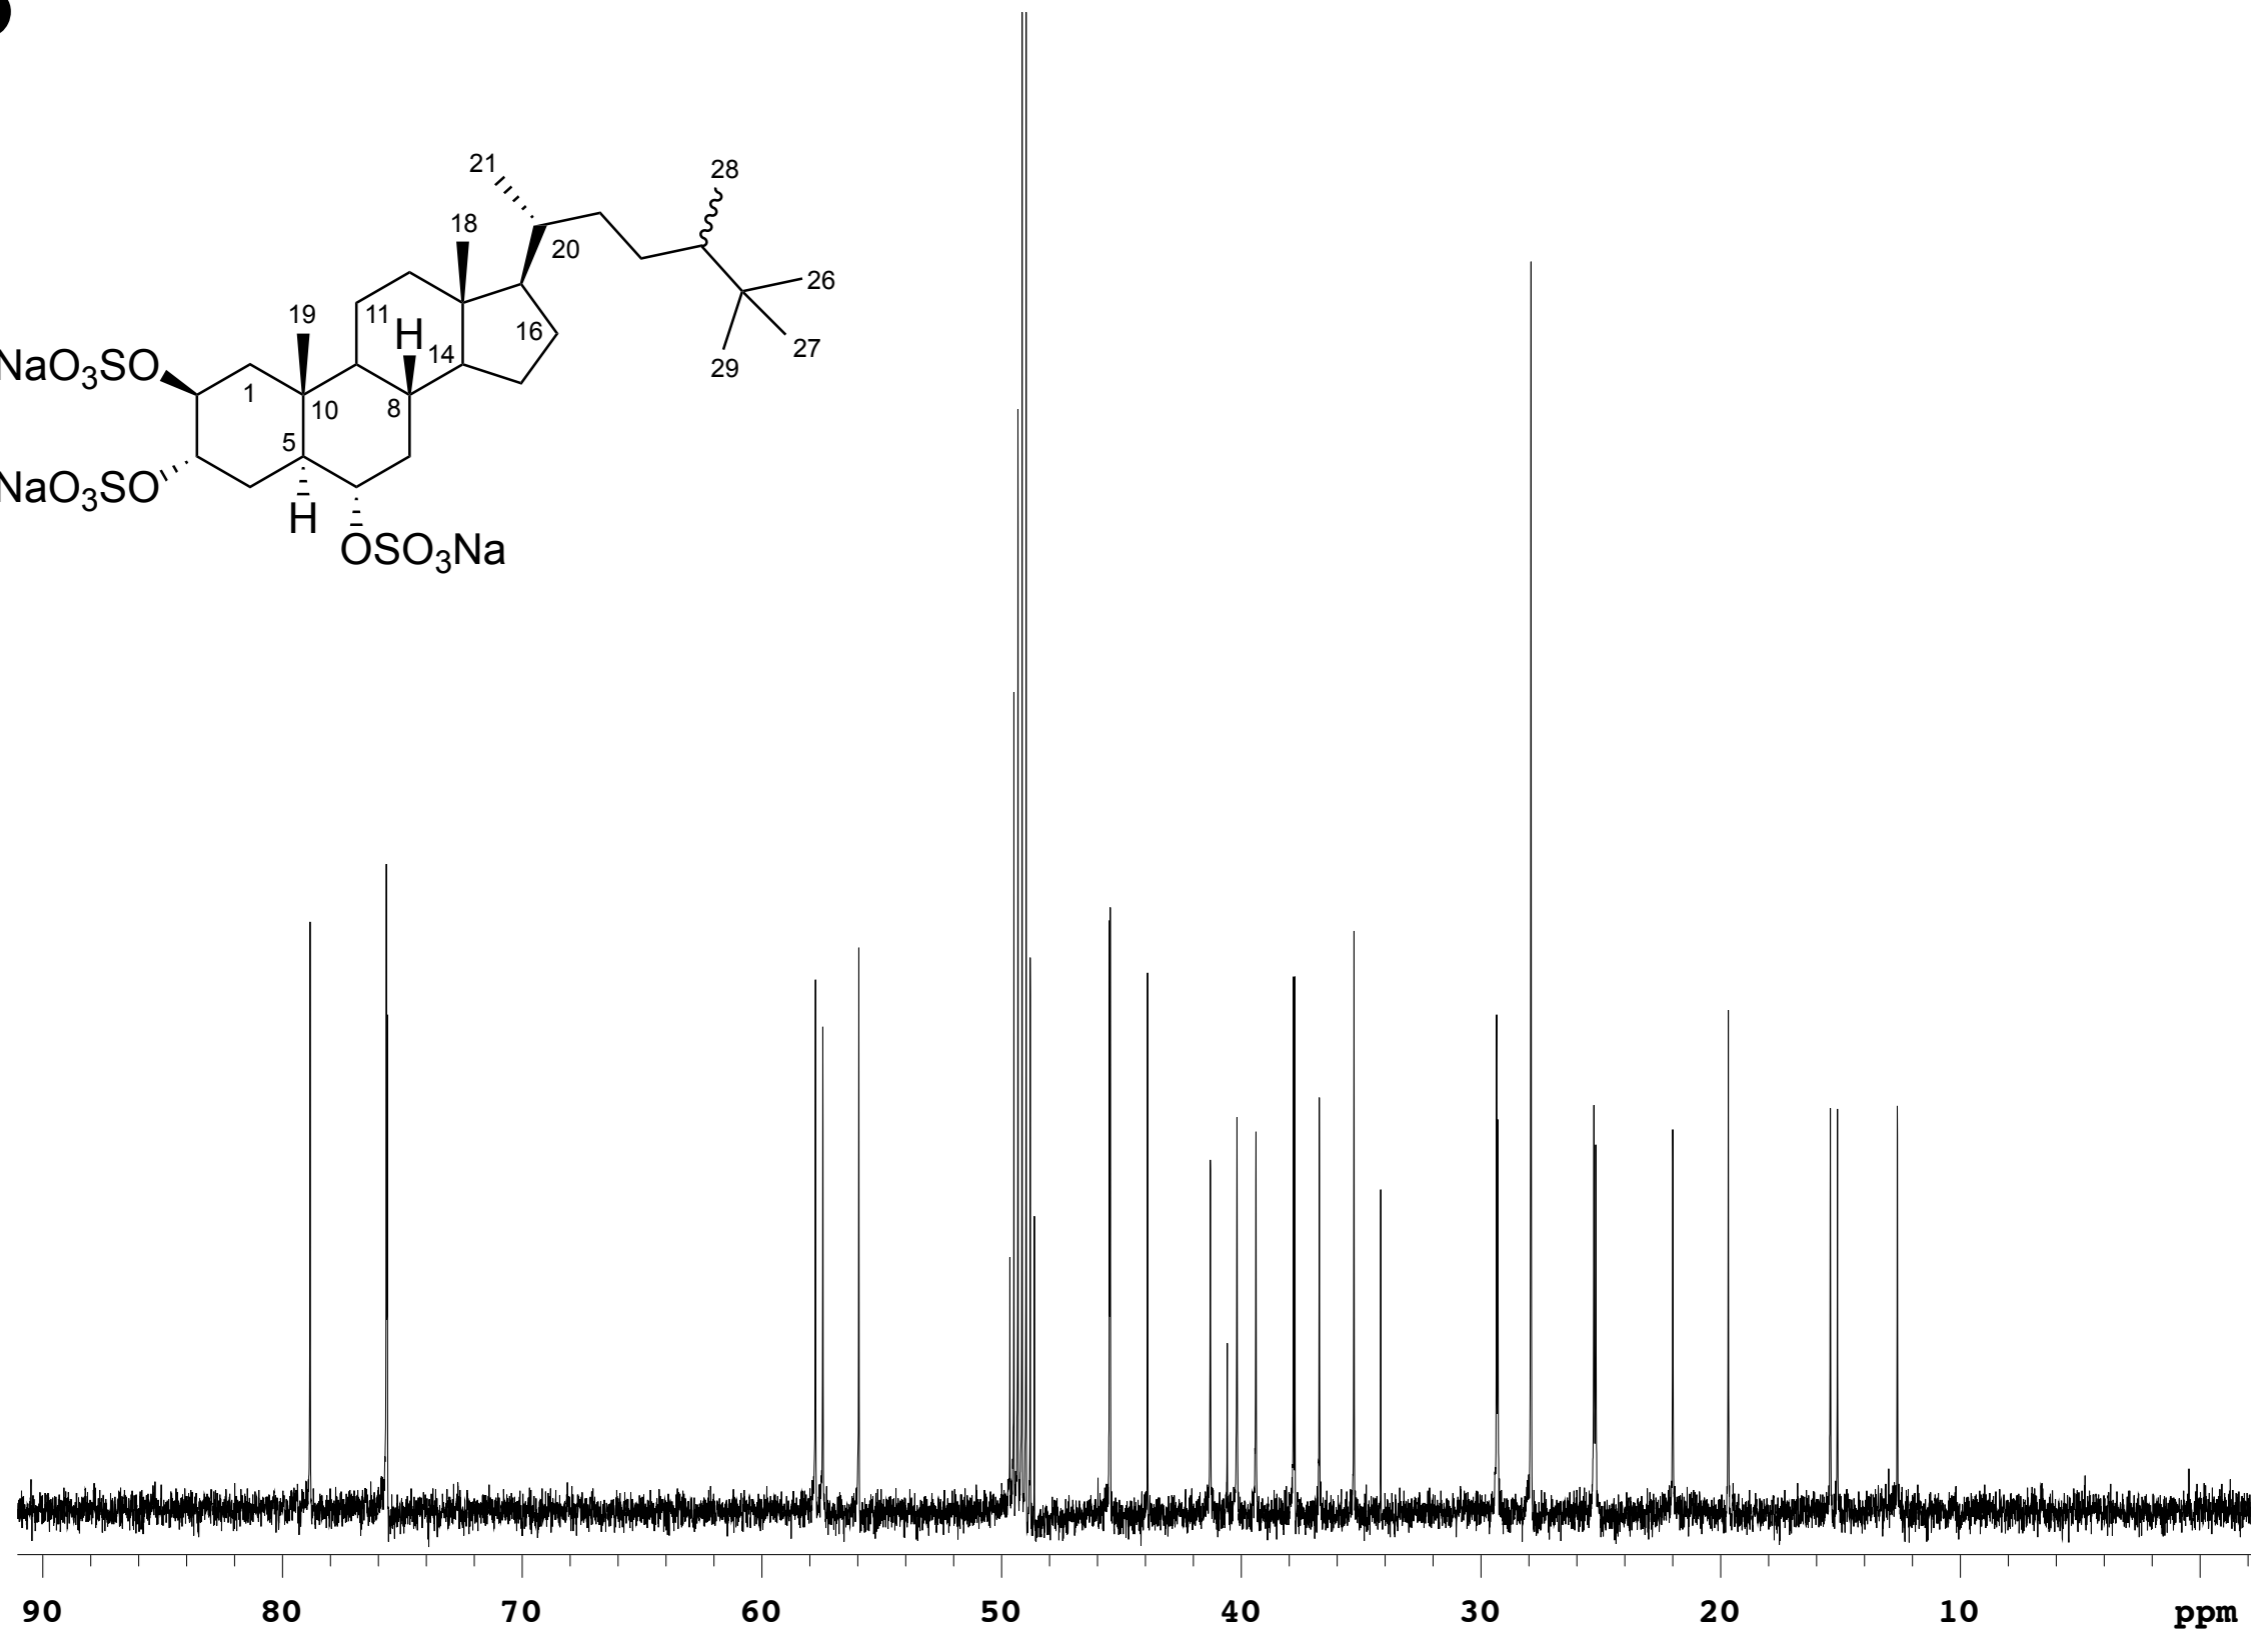

Supplementary Figure 2C

C

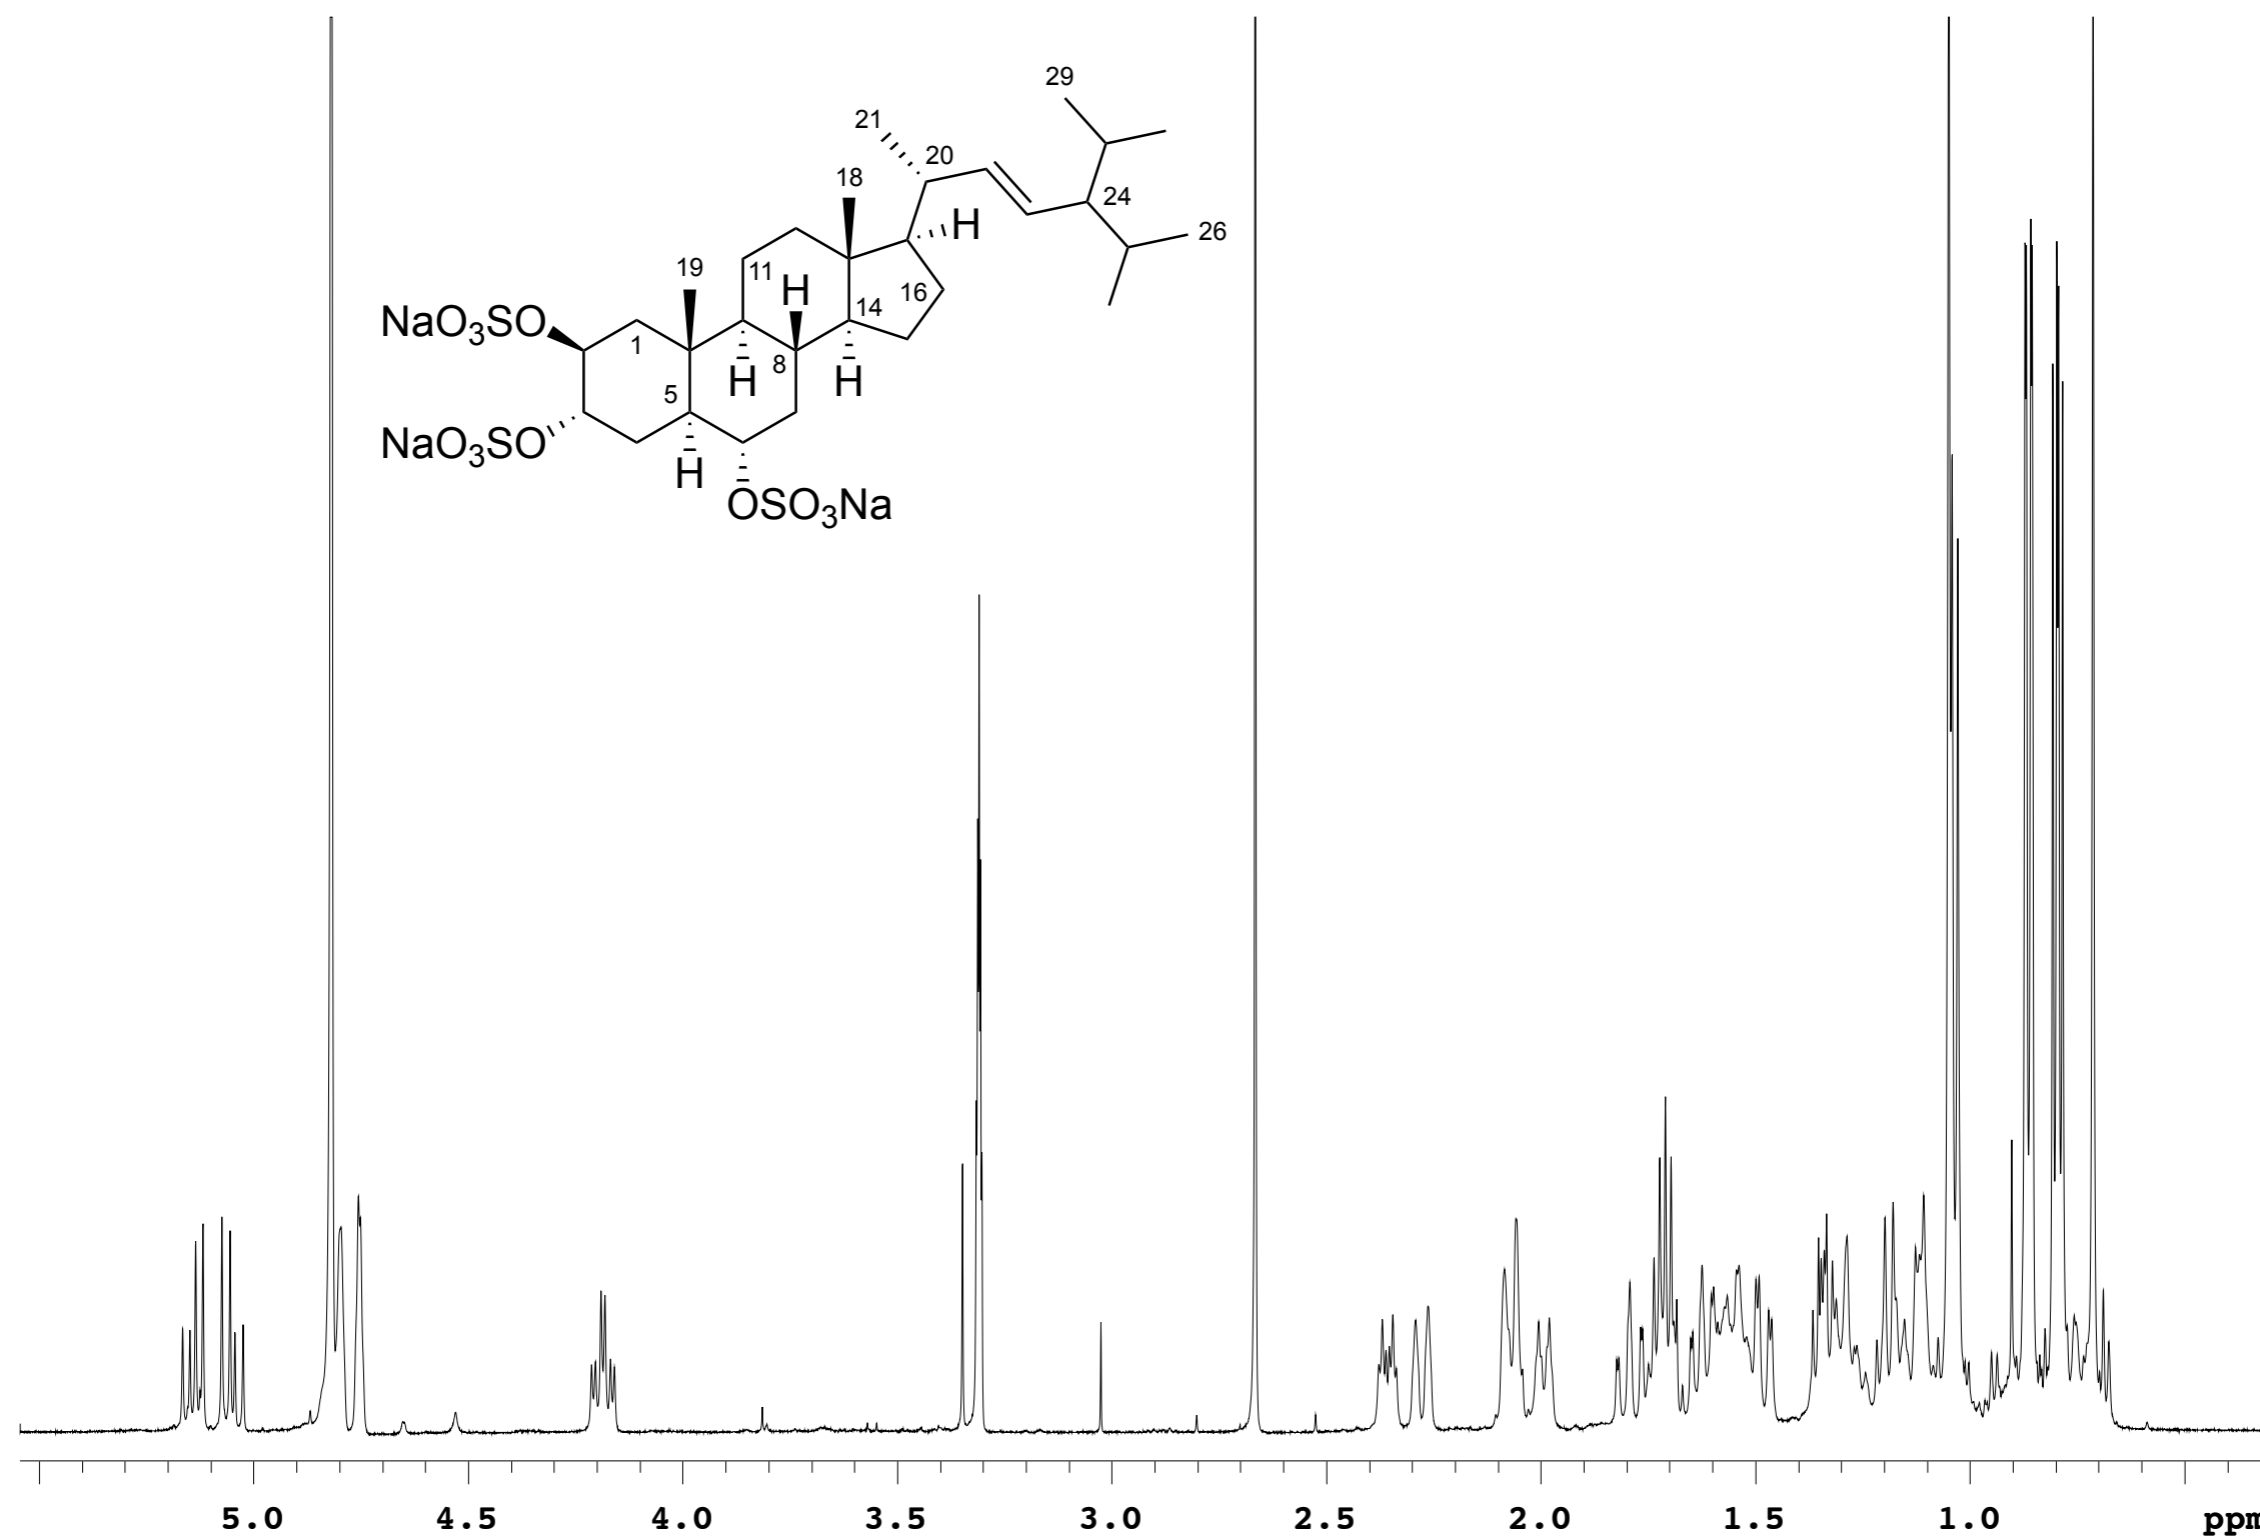



Supplementary Figure 2D

D

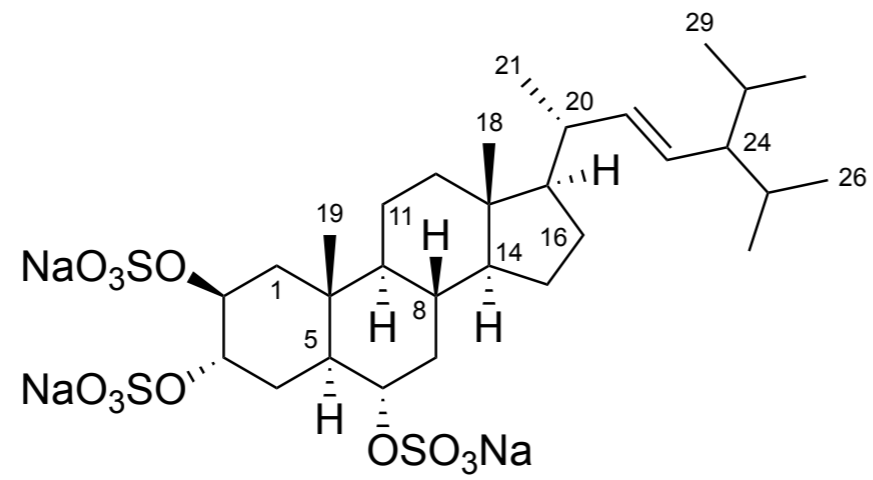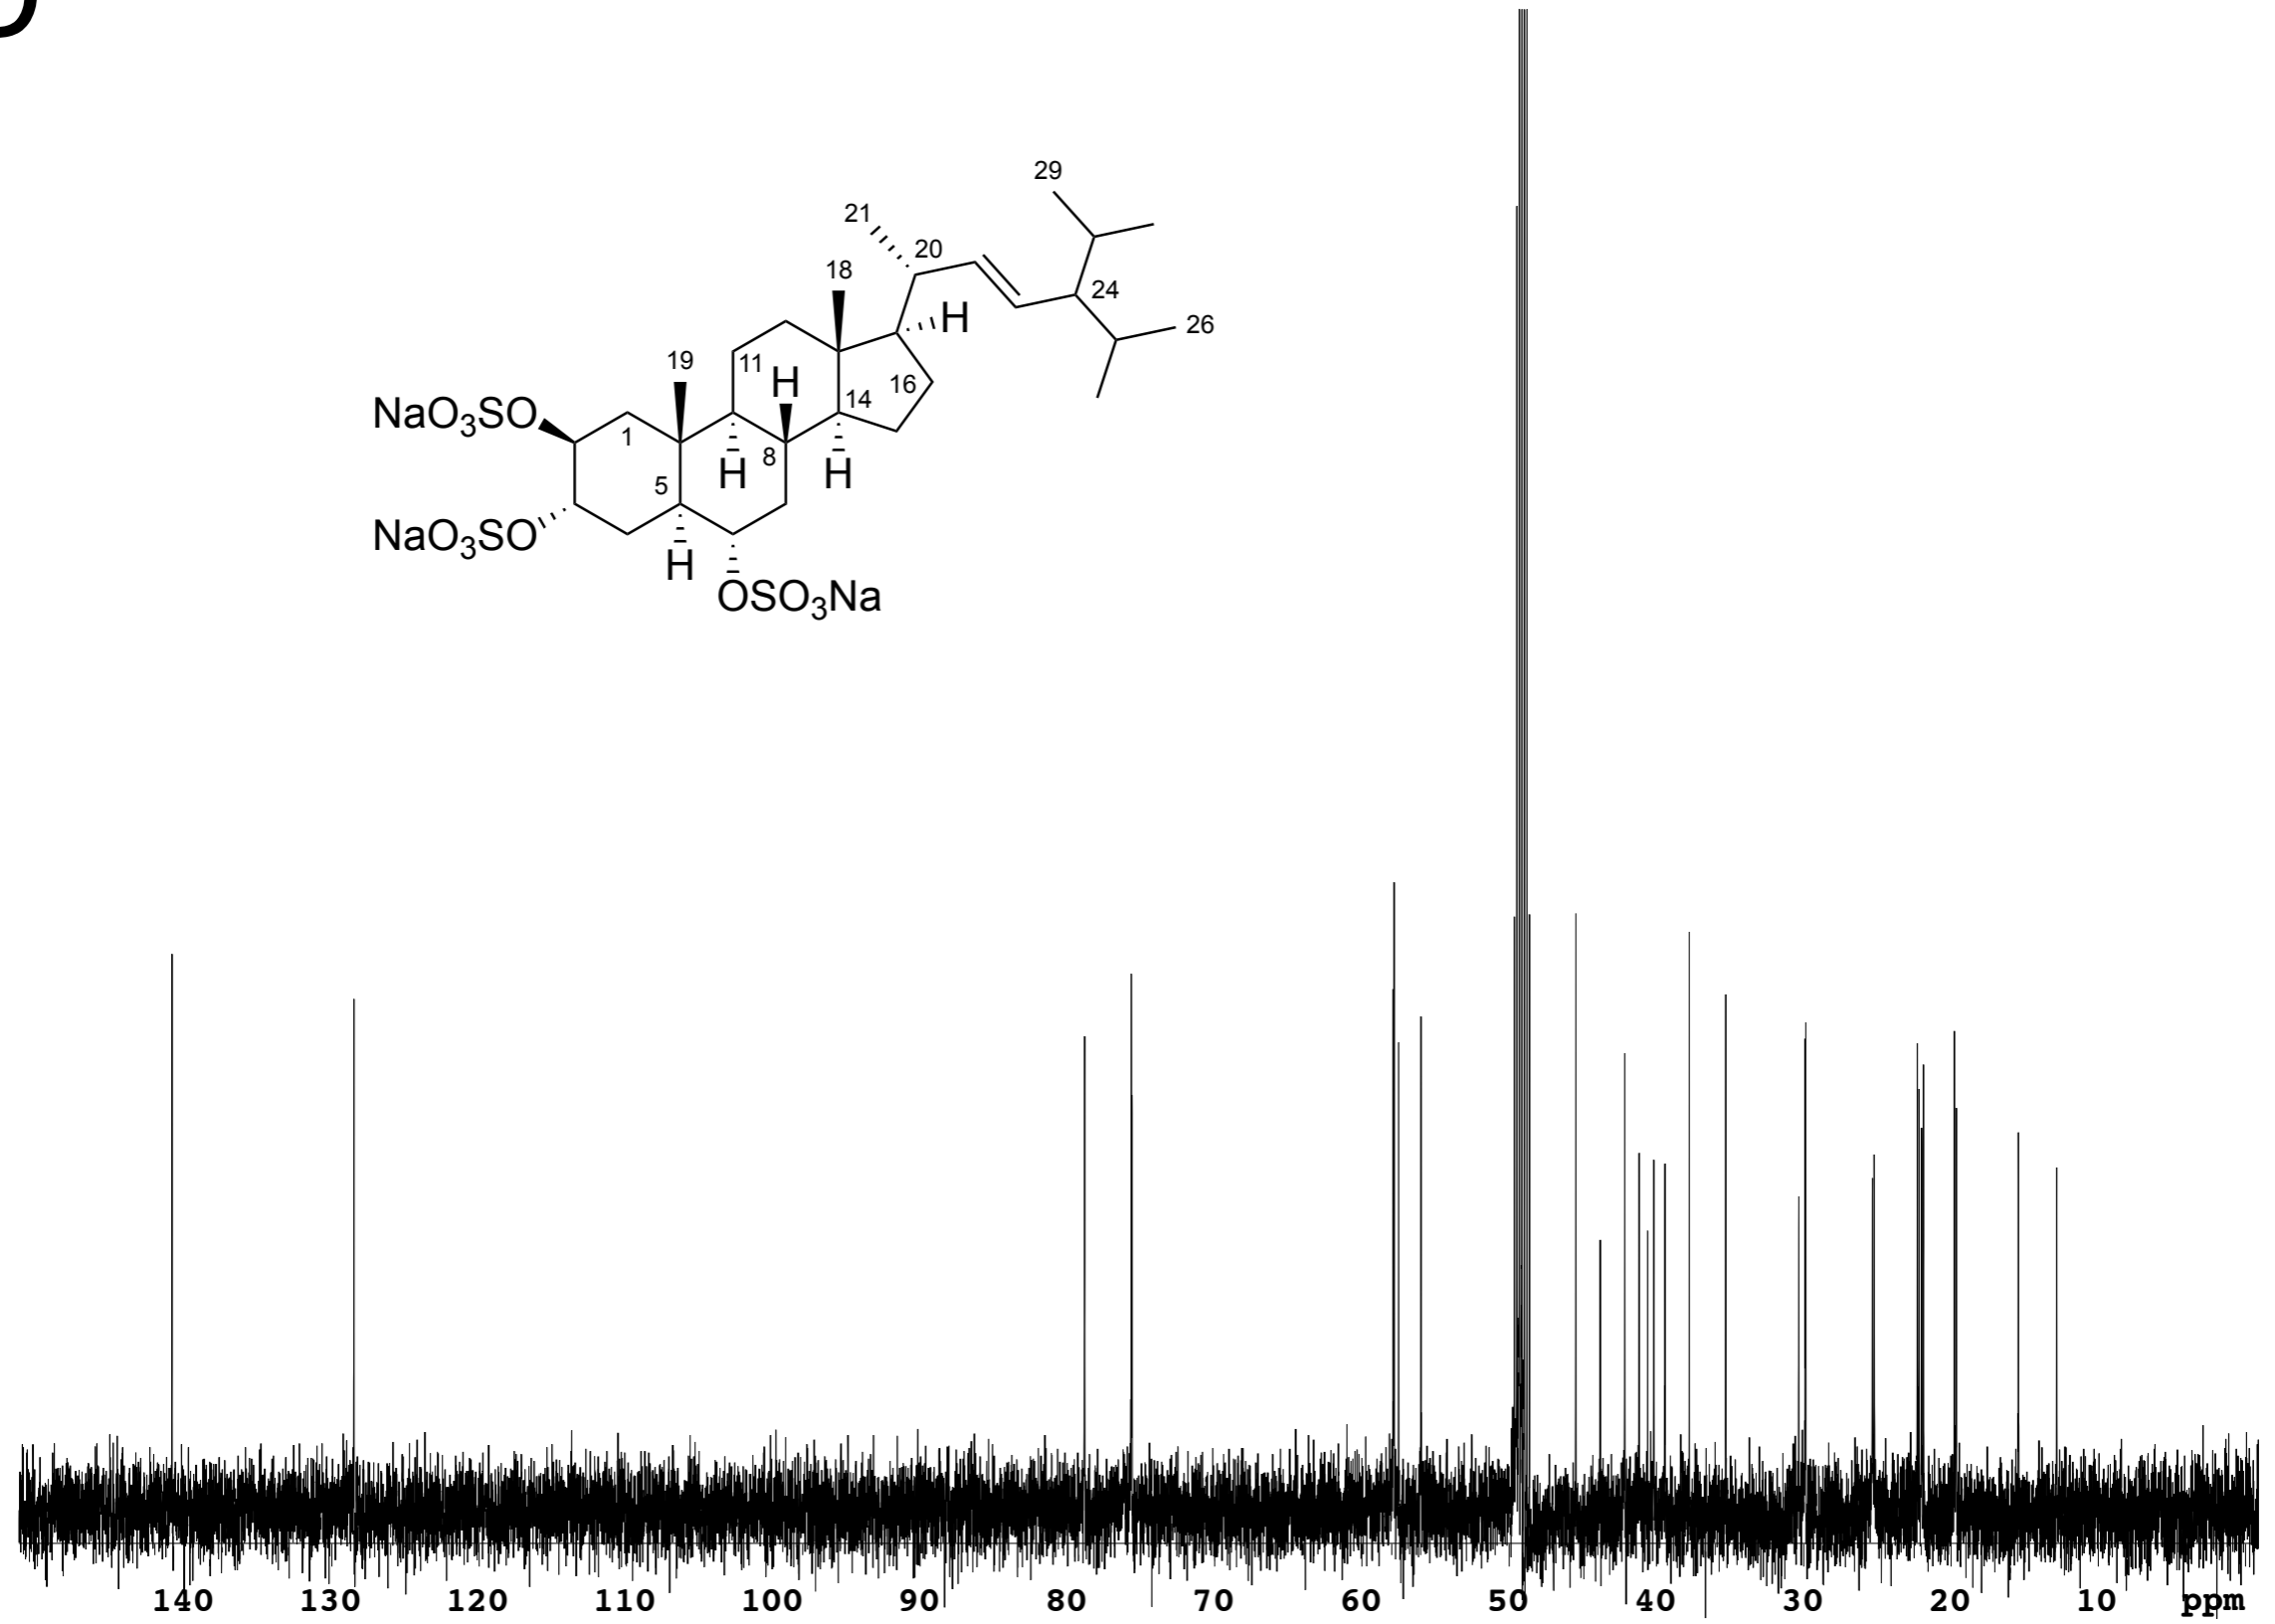

# A

## Supplementary Figure 3A

HPLC of RMV-B1-114-5 3x  
mkh2-141-2\_neg\_2 498 (13.549)

1: TOF MS ES-  
1.85e3

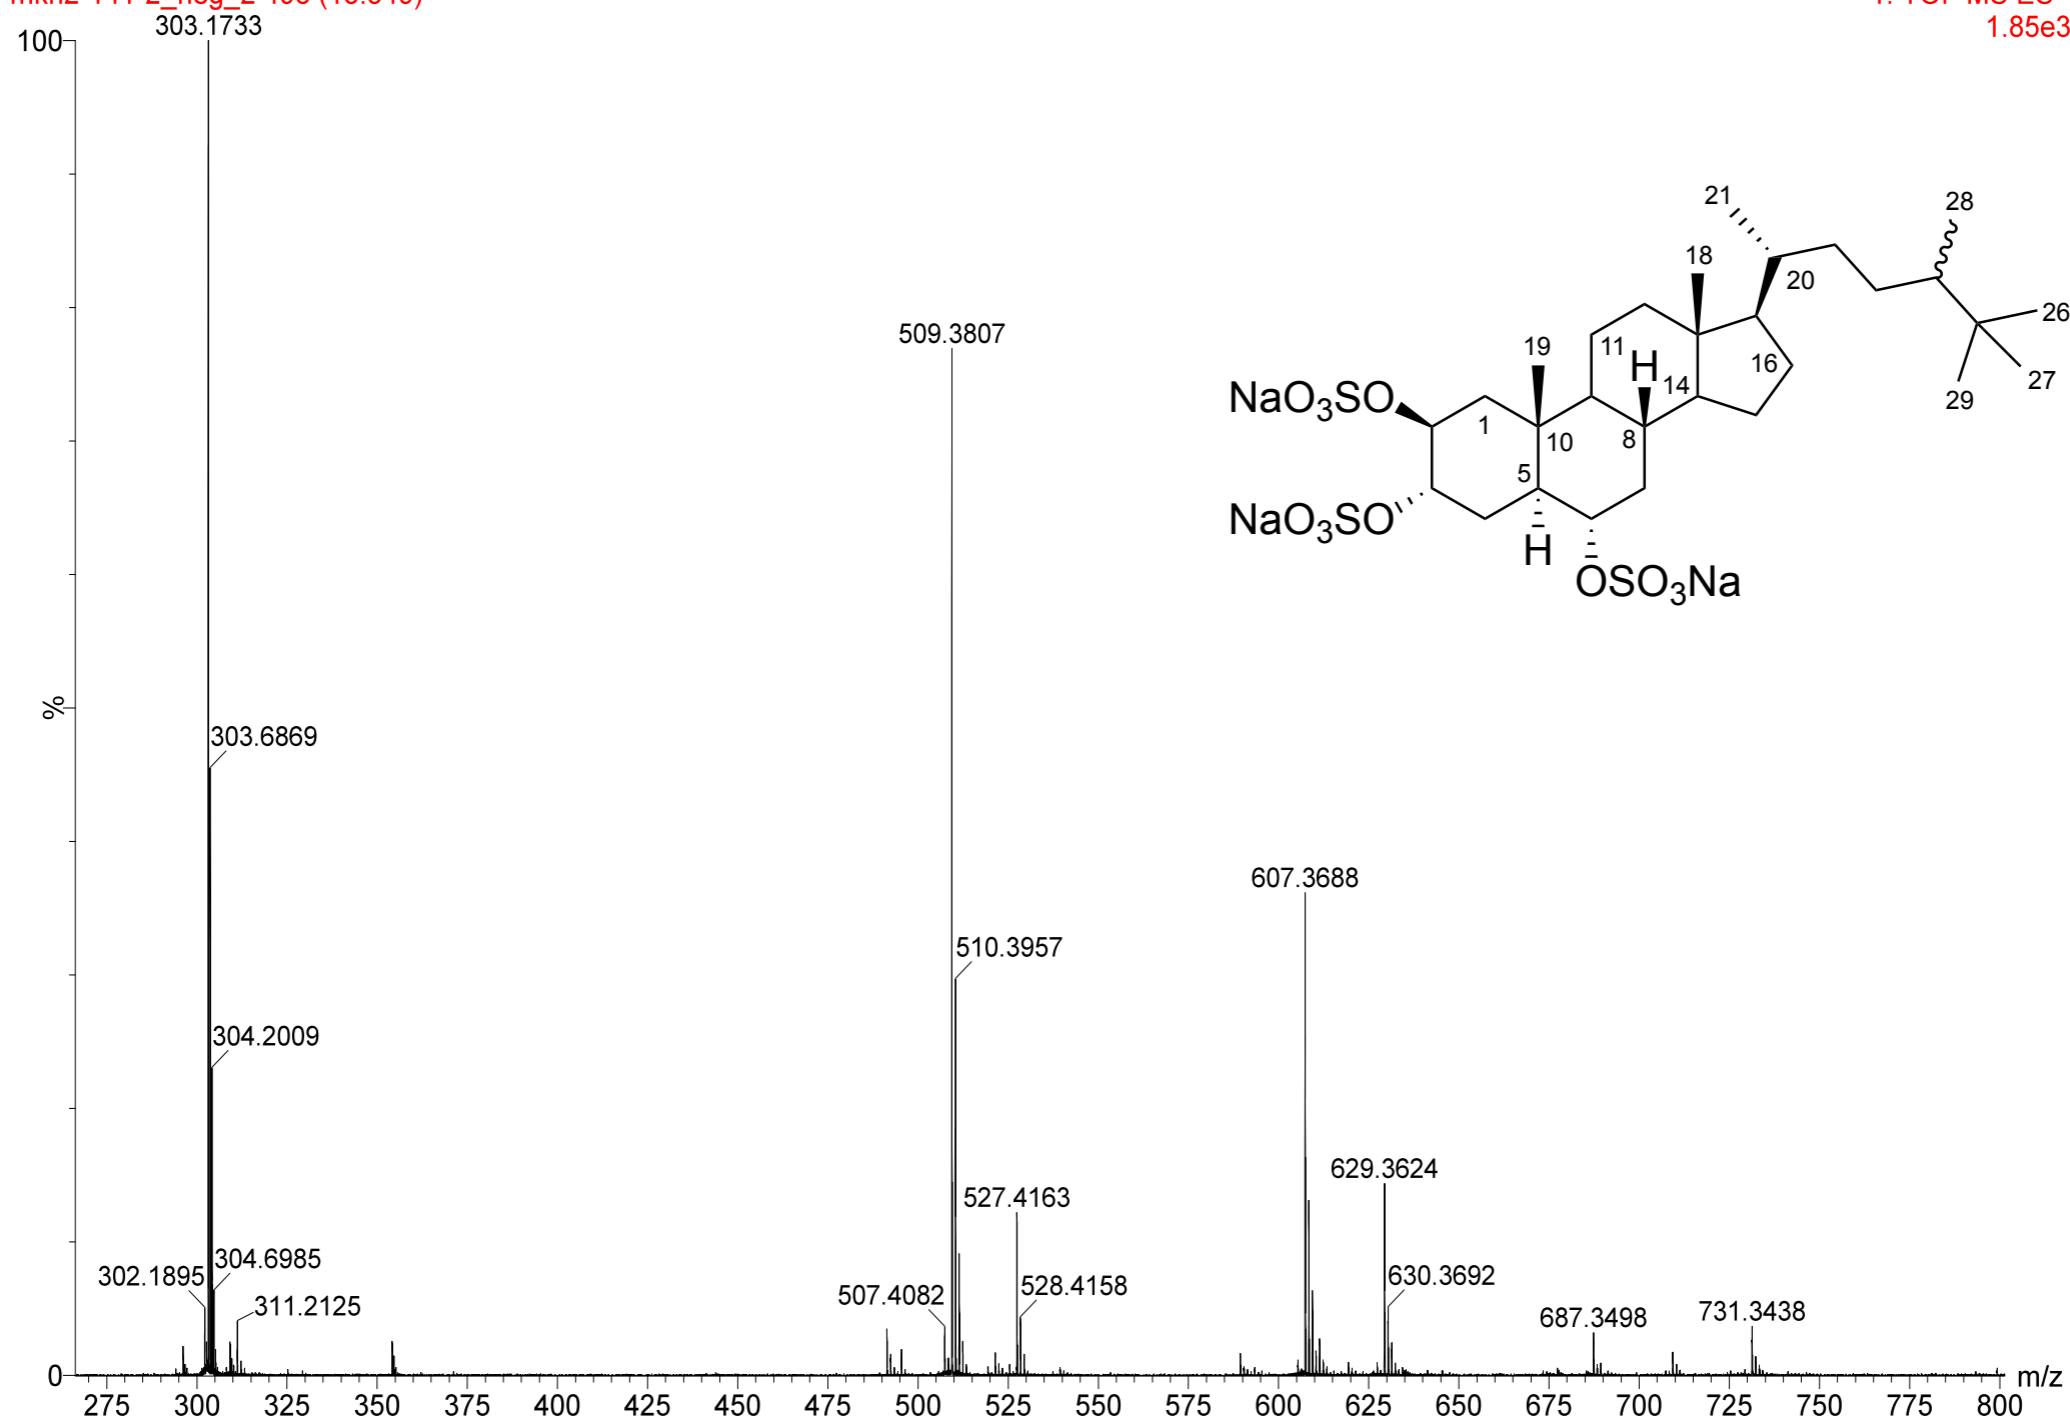

# B

## Supplementary Figure 3B

HPLC of RMV-B1-114-5 3x  
mkh2-141-4\_neg\_2 577 (15.441)

1: TOF MS ES-  
874

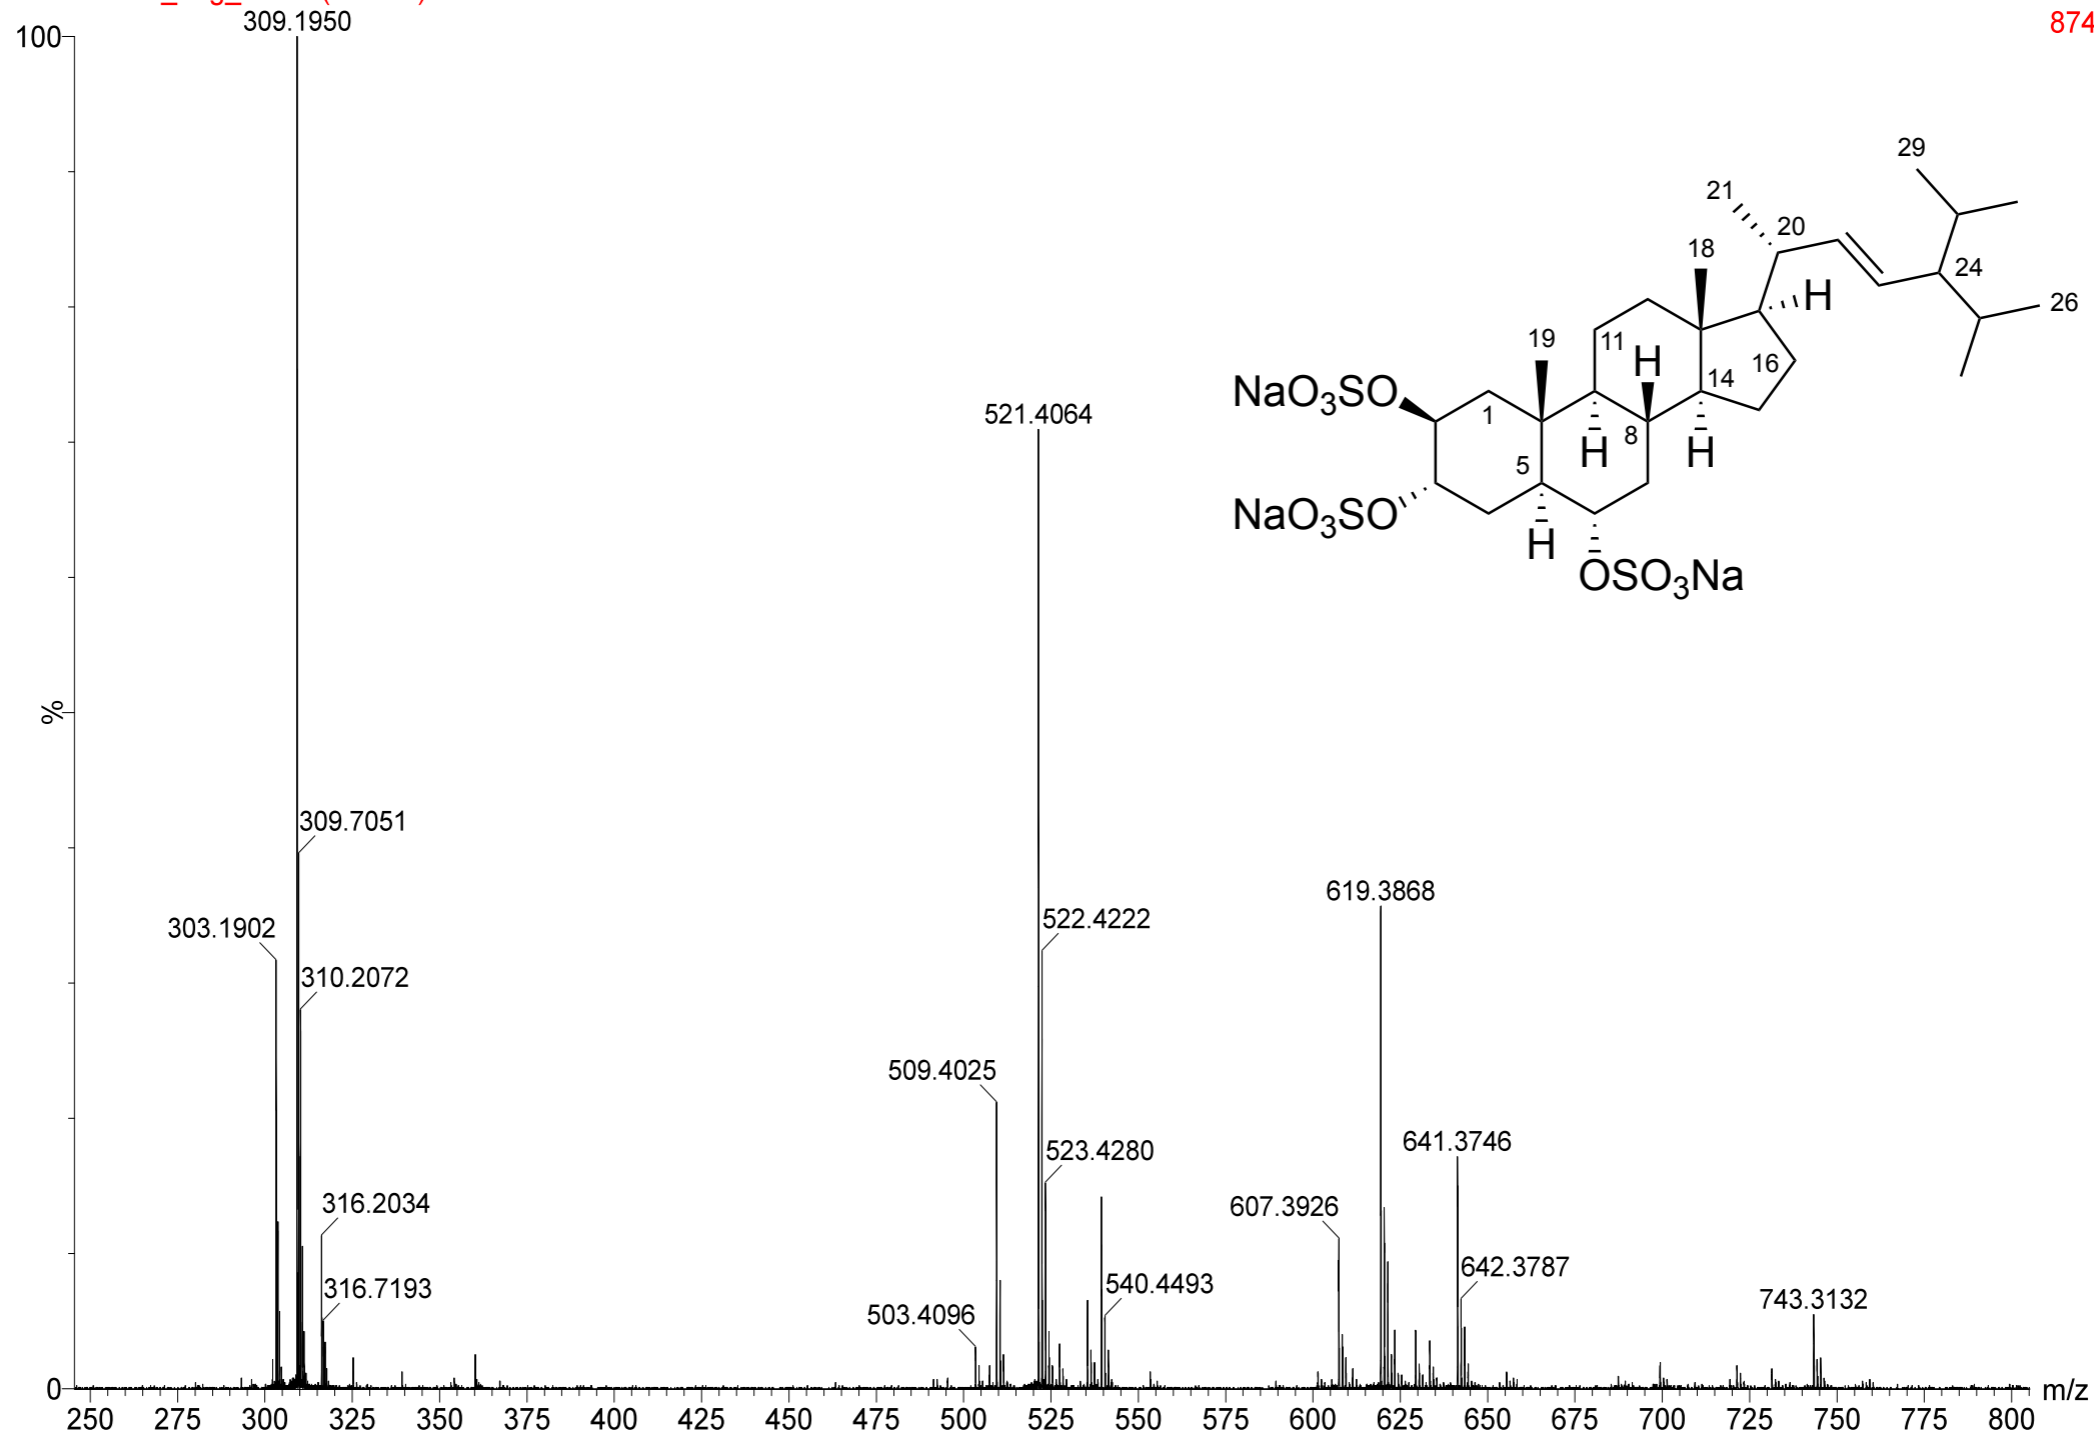

# A

Supplementary Figure 4A

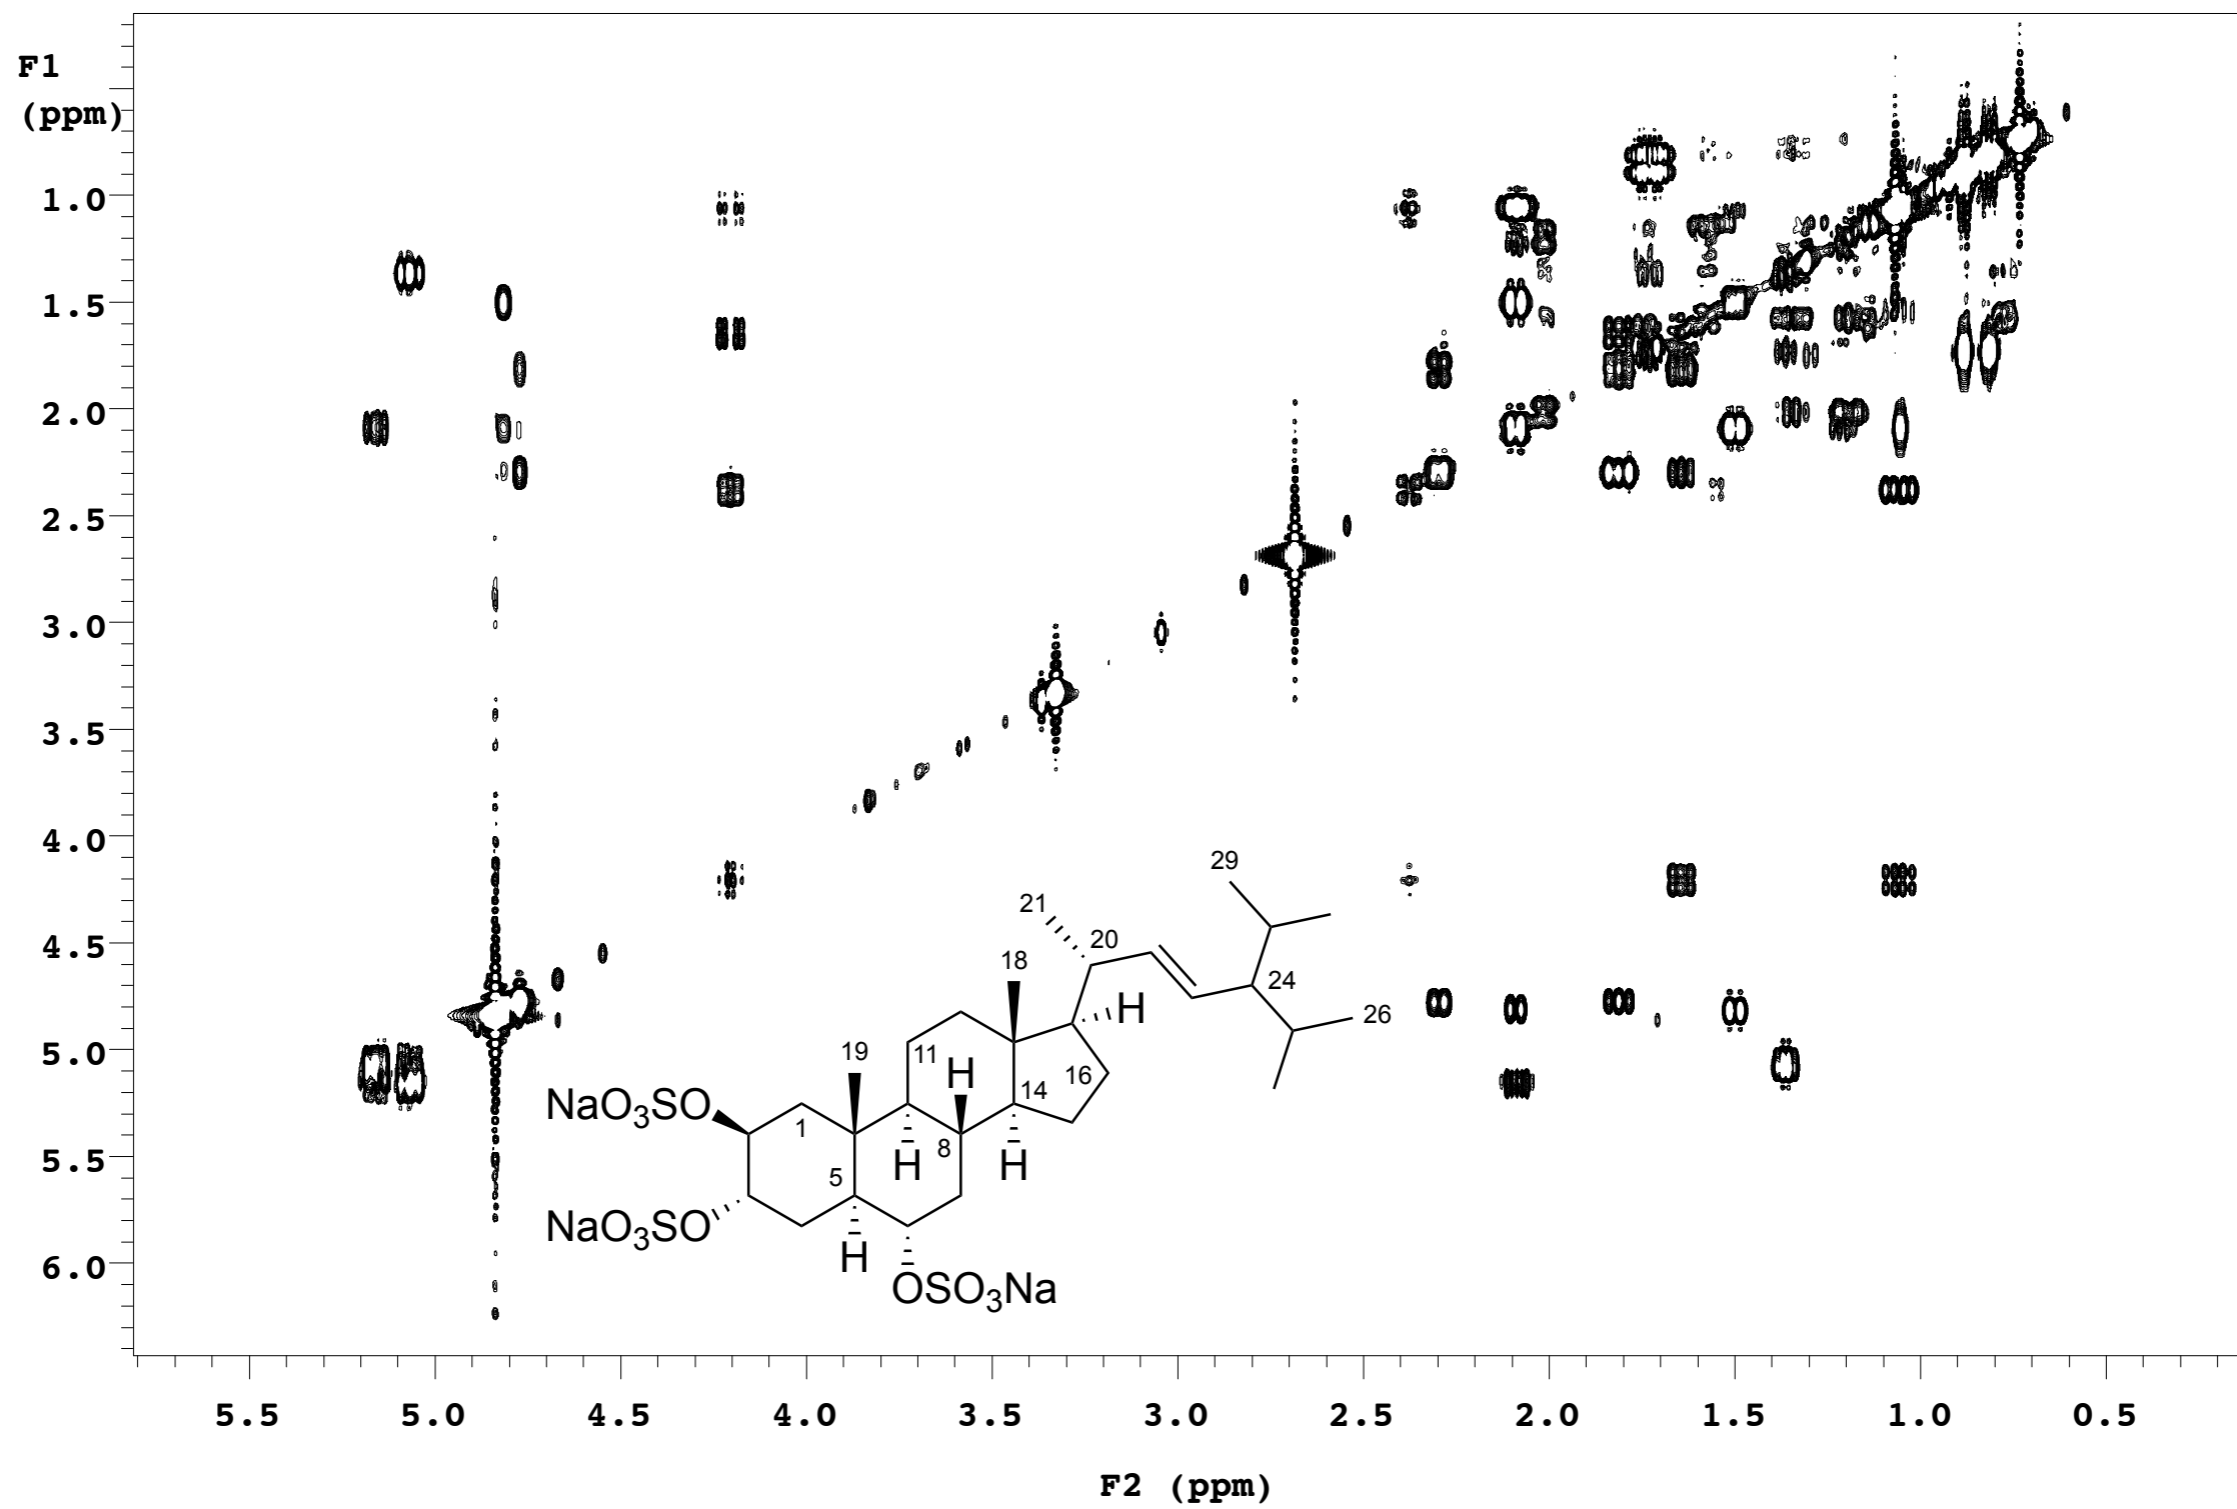

**B**

Supplementary Figure 4B

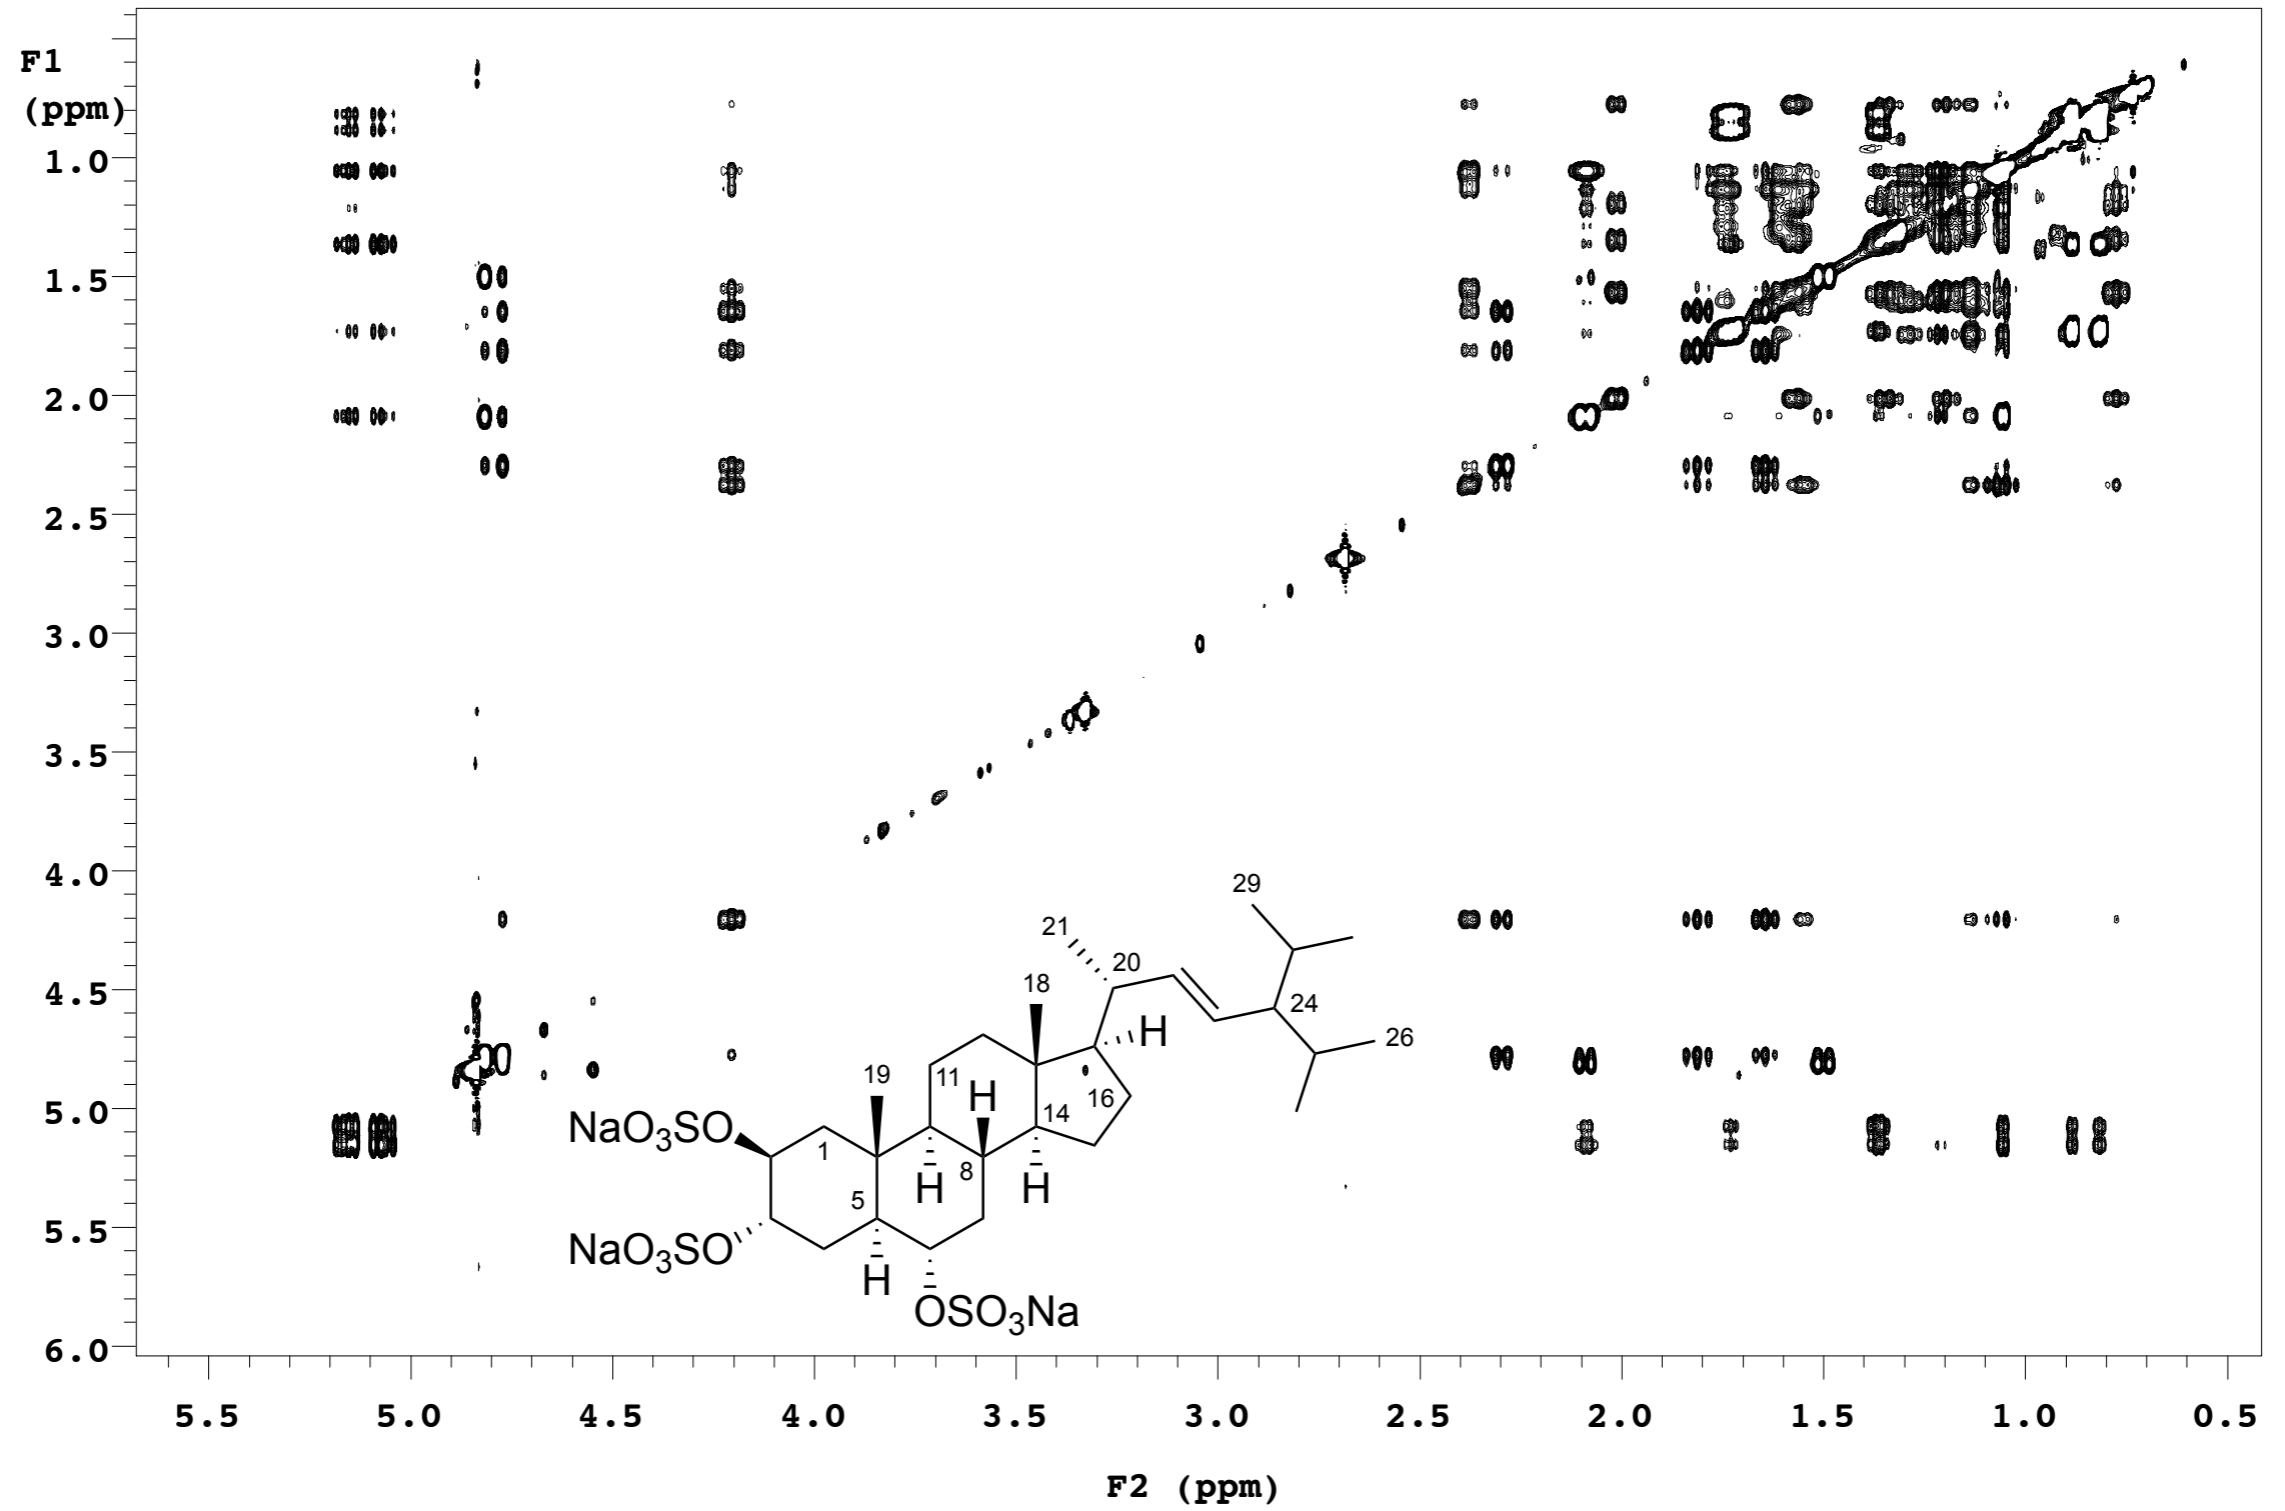

**C**

Supplementary Figure 4C

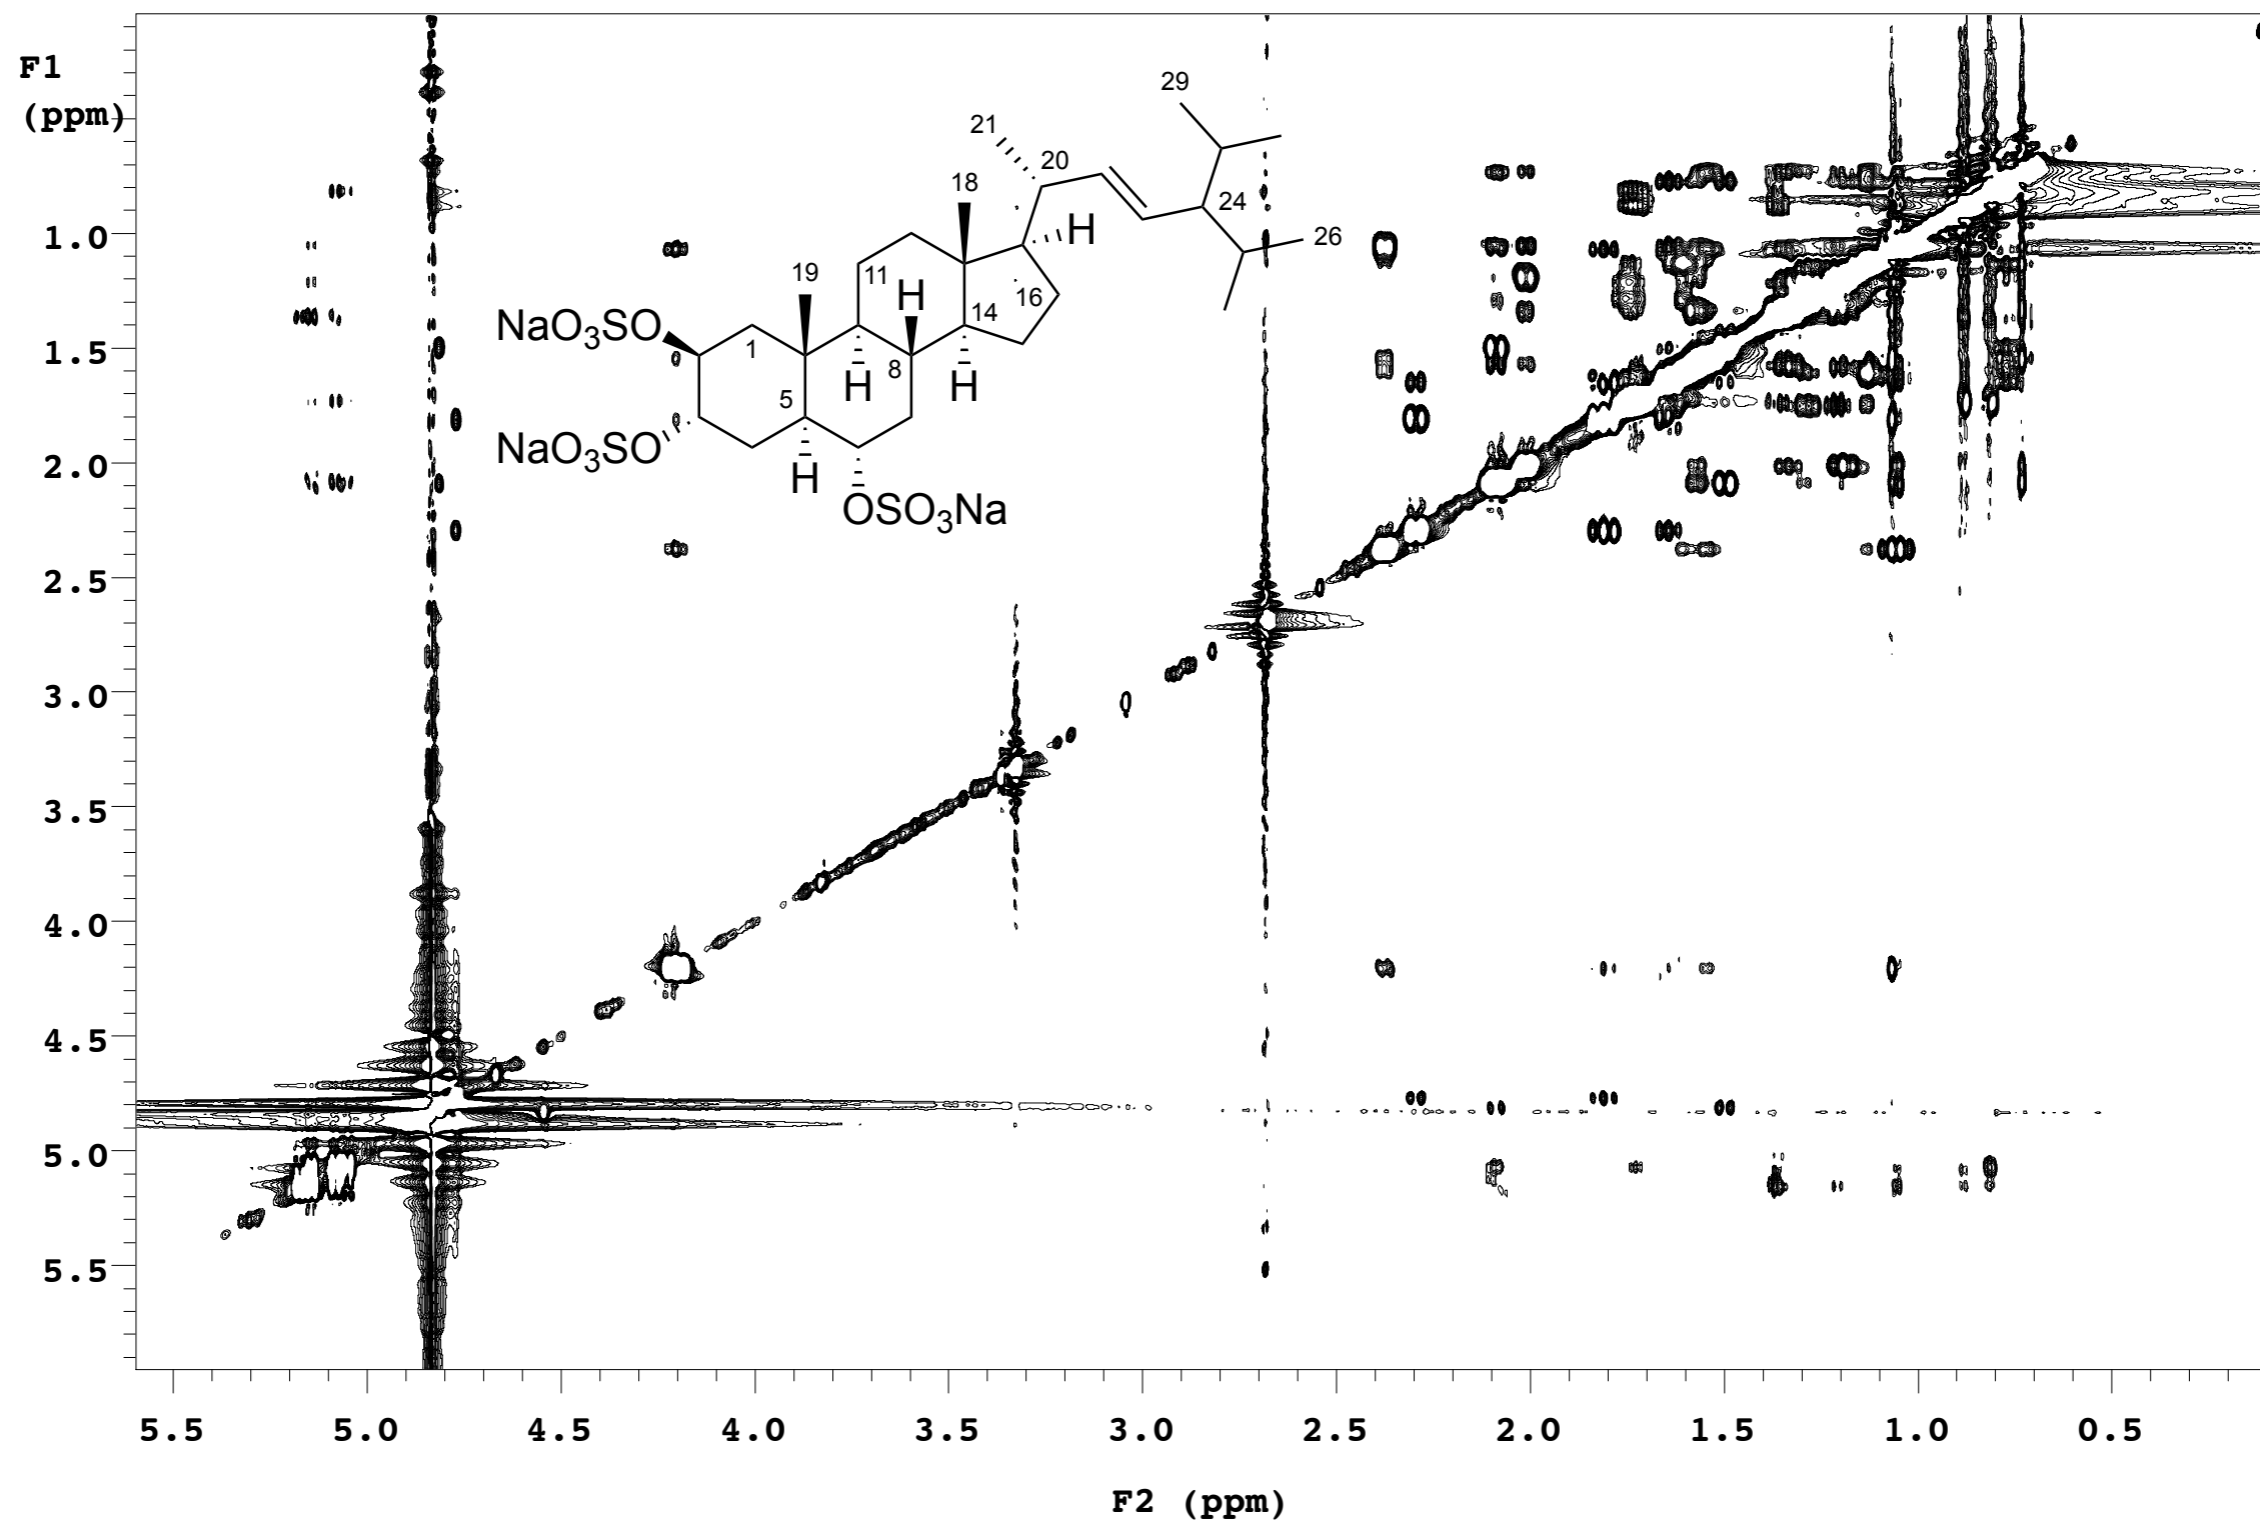

**D**

Supplementary Figure 4D

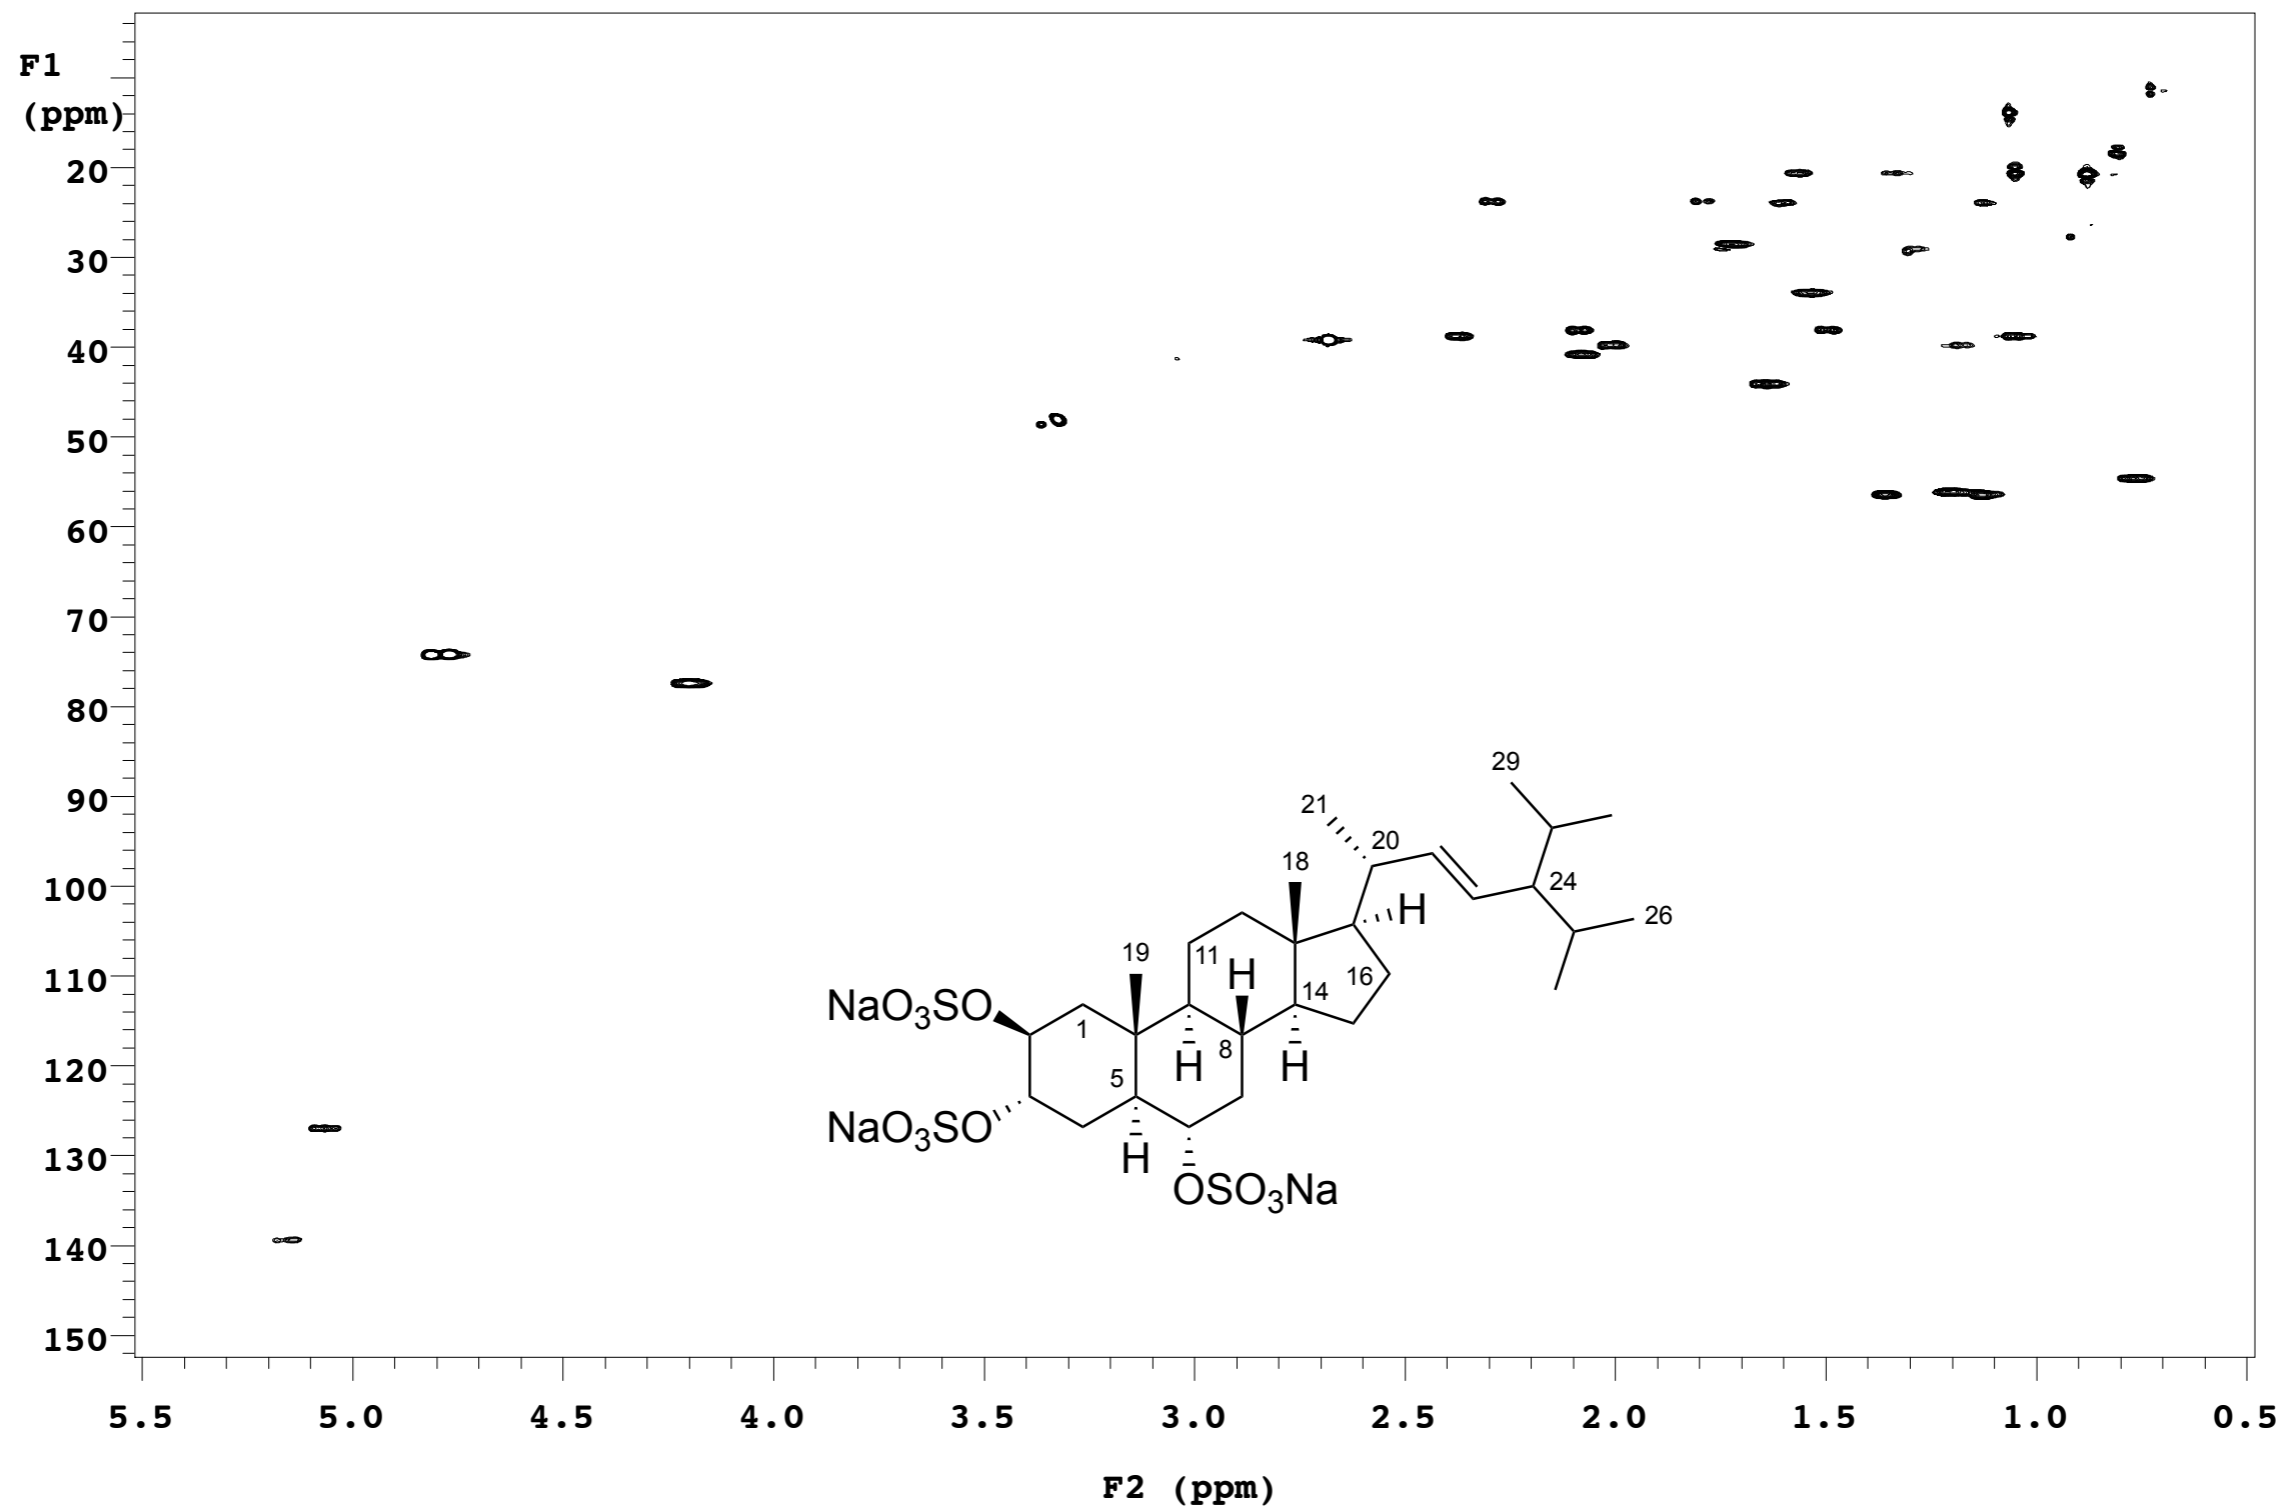

**E**

Supplementary Figure 4E

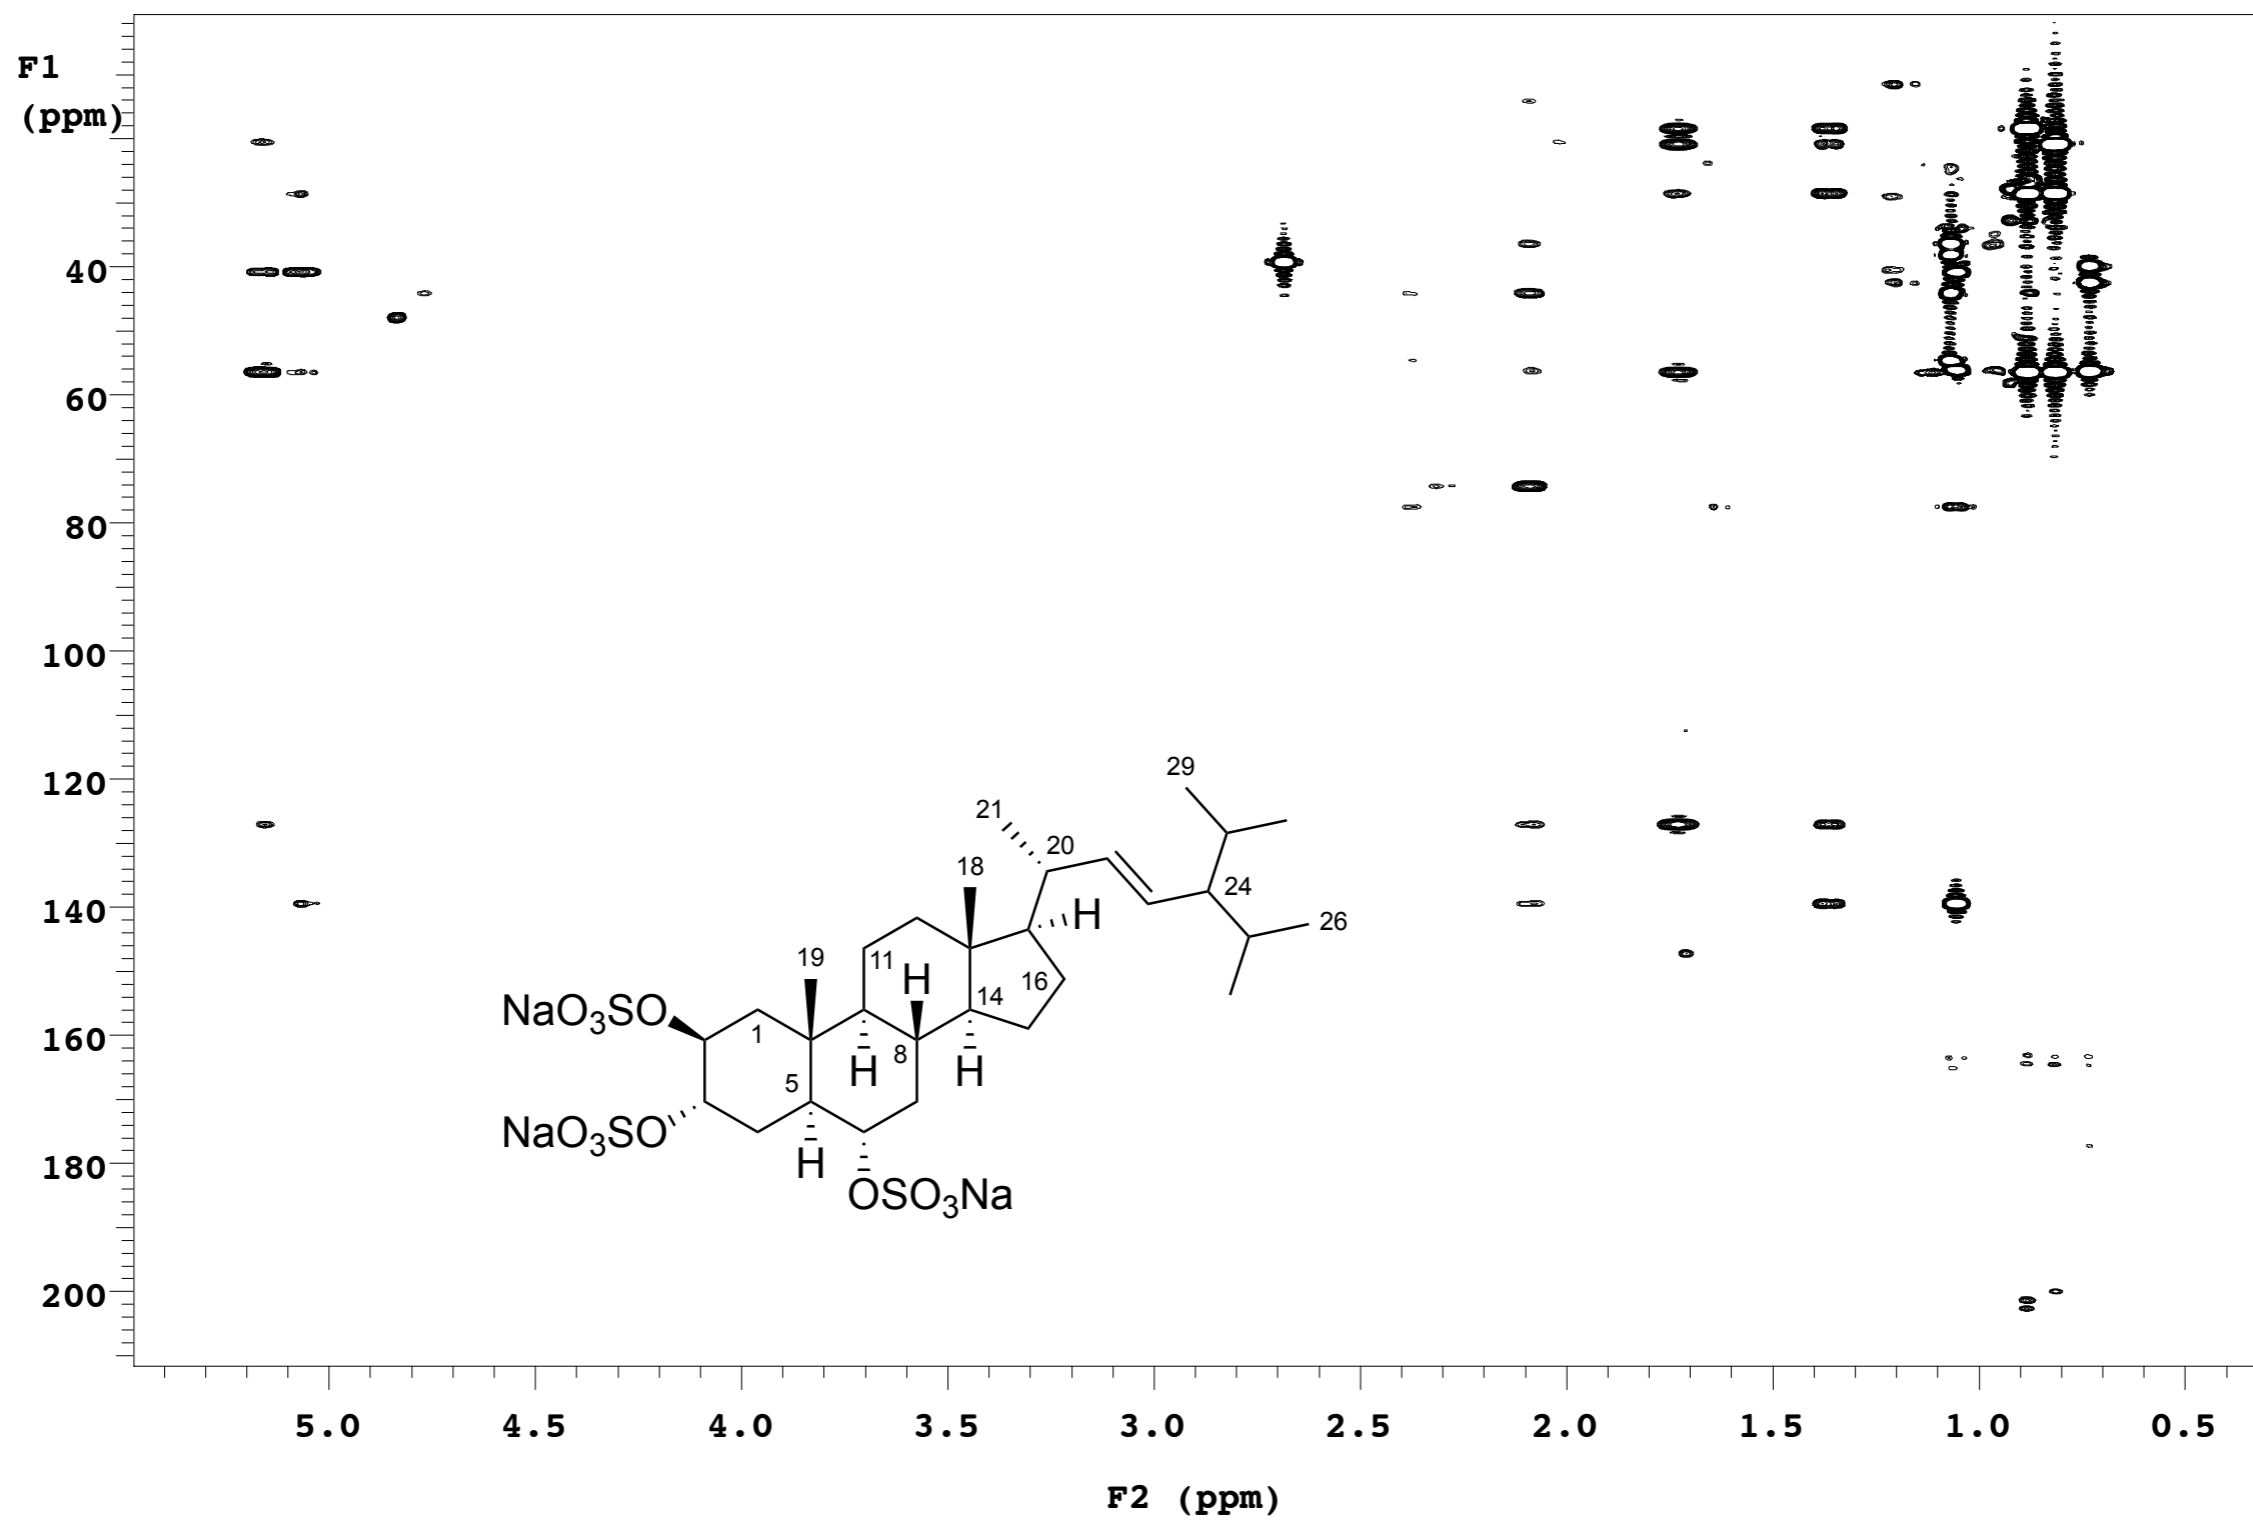



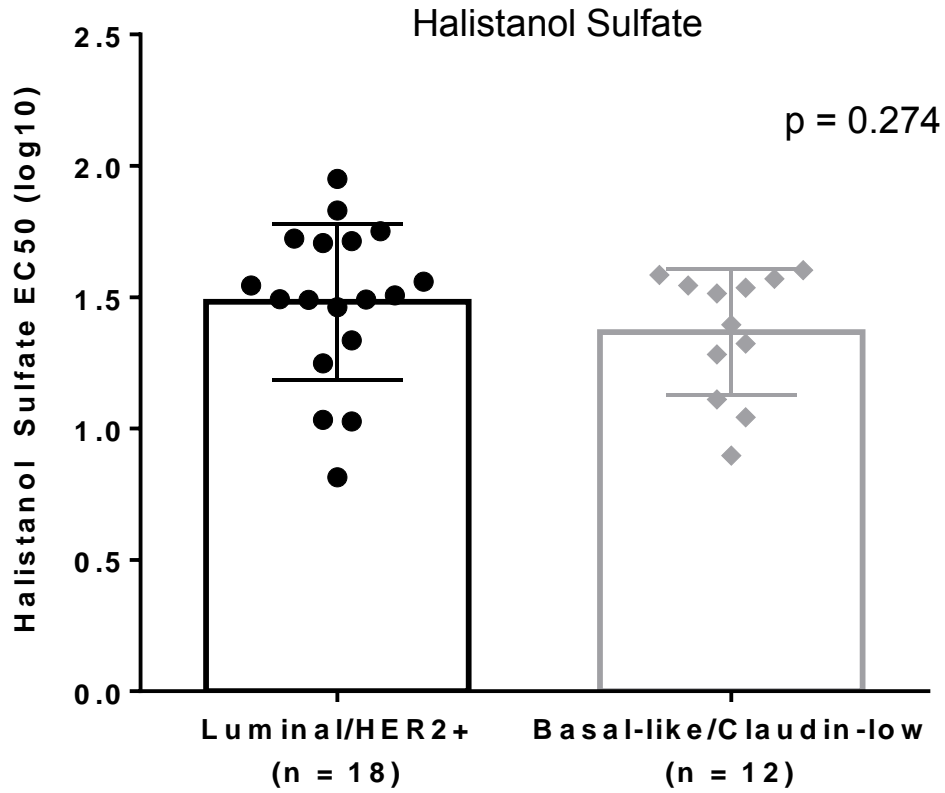

# Supplementary Figure 5B

## Topsentinol L Trisulfate

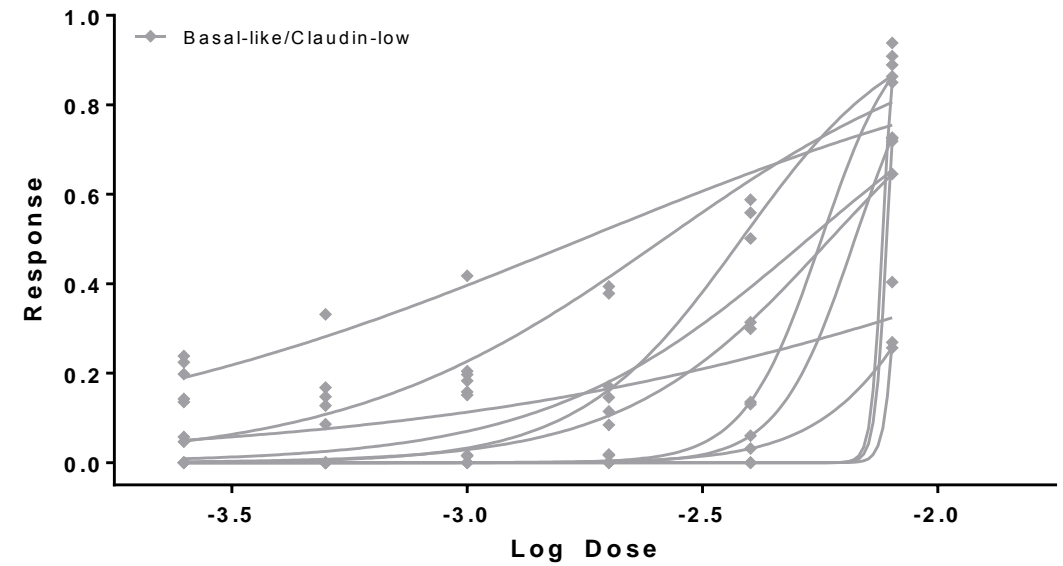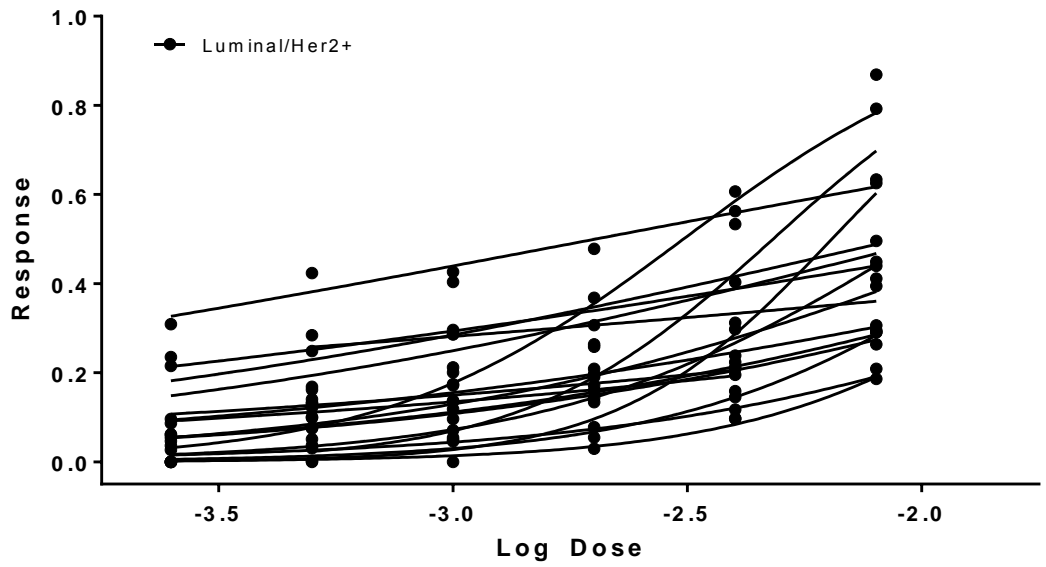

# Supplementary Figure 6

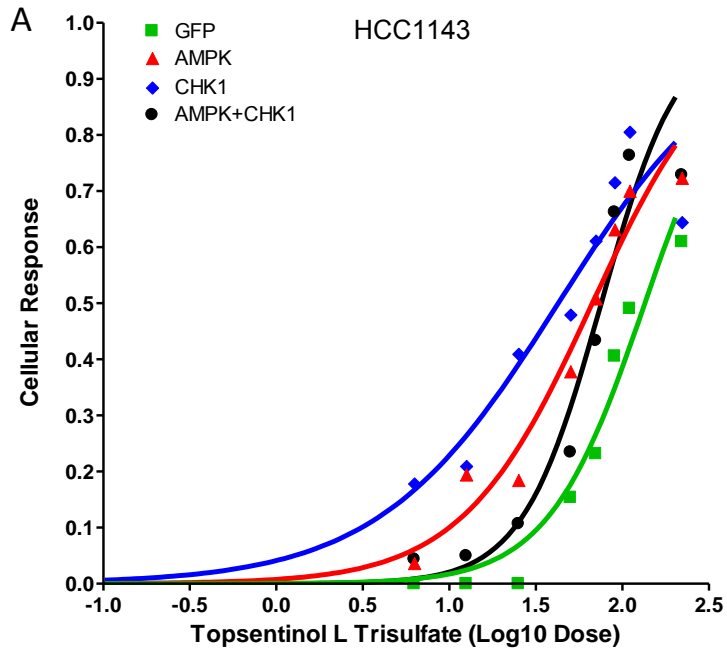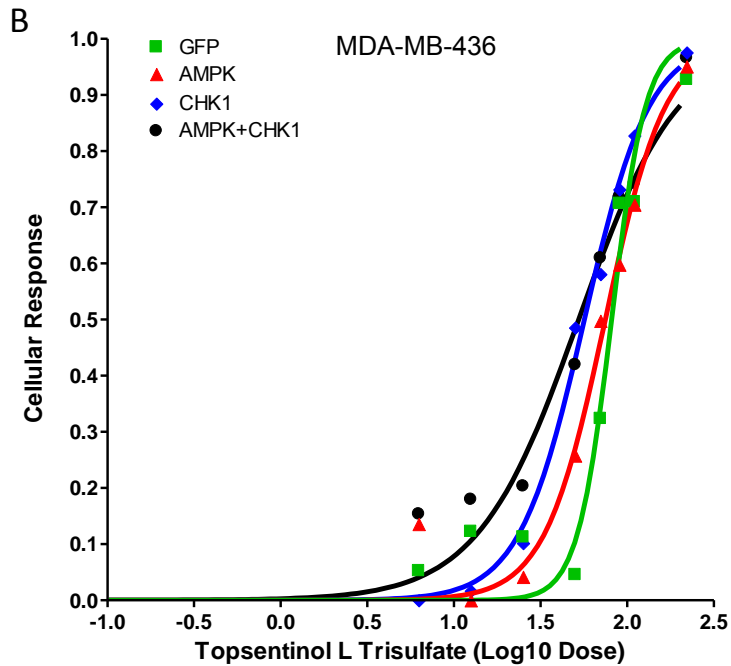

Supplementary Table 1

| Breast Cancer Cell Line | ER | PR | HER2 | Gene-expression Subtype             | Media | ATCC Number |
|-------------------------|----|----|------|-------------------------------------|-------|-------------|
| AU565                   | -  | -  | +    | luminal/HER2 positive               | RPMI  | CRL-2351    |
| BT-20                   | -  | -  | -    | basal                               | DMEM  | HTB-19      |
| BT-474                  | +  | +  | +    | luminal/HER2 positive               | DMEM  | HTB-20      |
| BT-483                  | +  | +  | -    | luminal                             | RPMI  | HTB-121     |
| BT-549                  | -  | -  | -    | claudin low                         | RPMI  | HTB-122     |
| CAMA-1                  | +  | -  | -    | luminal                             | DMEM  | HTB-21      |
| HCC1143                 | -  | -  | -    | basal                               | RPMI  | CRL-2321    |
| HCC1395                 | -  | -  | -    | basal                               | RPMI  | CRL-2324    |
| HCC1419                 | -  | -  | +    | luminal/HER2 positive               | RPMI  | CRL-2326    |
| HCC1500                 | +  | +  | -    | basal                               | RPMI  | CRL-2329    |
| HCC1569                 | -  | -  | +    | basal/HER2 positive                 | RPMI  | CRL-2330    |
| HCC1599                 | -  | -  | -    | basal                               | RPMI  | CRL-2331    |
| HCC1806                 | -  | -  | -    | basal                               | RPMI  | CRL-2335    |
| HCC1937                 | -  | -  | -    | basal                               | RPMI  | CRL-2336    |
| HCC1954                 | -  | -  | +    | basal/HER2 positive                 | RPMI  | CRL-2338    |
| HCC2218                 | -  | -  | +    | luminal                             | RPMI  | CRL-2343    |
| HCC38                   | -  | -  | -    | claudin low                         | RPMI  | CRL-2314    |
| HCC70                   | -  | -  | -    | basal                               | RPMI  | CRL-2315    |
| Hs 578T                 | -  | -  | -    | claudin low                         | DMEM  | HTB-126     |
| JIMT-1                  | -  | -  | +    | basal/HER2 positive trastuzumab Res | DMEM  | Unavailable |
| MCF7                    | +  | +  | -    | luminal                             | DMEM  | HTB-22      |
| MDA-MB-134-VI           | +  | -  | -    | luminal                             | RPMI  | HTB-23      |
| MDA-MB-157              | -  | -  | -    | claudin low                         | DMEM  | HTB-24      |
| MDA-MB-175-VII          | +  | -  | -    | luminal                             | RPMI  | HTB-25      |
| MDA-MB-231              | -  | -  | -    | claudin low                         | RPMI  | HTB-26      |
| MDA-MB-415              | +  | -  | -    | luminal                             | RPMI  | HTB-128     |
| MDA-MB-436              | -  | -  | -    | claudin low                         | RPMI  | HTB-130     |
| MDA-MB-453              | -  | -  | -    | luminal                             | RPMI  | HTB-131     |
| MDA-MB-468              | -  | -  | -    | basal                               | RPMI  | HTB-132     |
| MDA-MB-361              | +  | -  | +    | luminal/HER2 positive               | DMEM  | HTB-27      |
| SK-BR-3                 | -  | -  | +    | luminal/HER2 positive               | RPMI  | HTB-30      |
| T-47D                   | +  | +  | -    | luminal                             | RPMI  | HTB-133     |

| Breast Cancer Cell Line | ER | PR | HER2 | Gene-expression Subtype | Media | ATCC Number |
|-------------------------|----|----|------|-------------------------|-------|-------------|
| UACC-812                | -  | -  | +    | luminal/HER2 positive   | DMEM  | CRL-1897    |
| ZR-75-1                 | +  | -  | -    | luminal                 | RPMI  | CRL-1500    |
| ZR-75-30                | +  | -  | +    | luminal/HER2 positive   | RPMI  | CRL-1504    |

| Lung Cancer Cell Line | Subtype        | K-Ras Mut | P53 Mut     | EGFR Mut     | Media | ATCC Number |
|-----------------------|----------------|-----------|-------------|--------------|-------|-------------|
| A549                  | Adenocarcinoma | G12S      | x           | x            | F12K  | CCL-185     |
| Calu-3                | Adenocarcinoma | x         | M237I       | x            | EMEM  | HTB-55      |
| NCI-H1155             | Large cell     | Q61H      | R273H       | x            | ACL-4 | CRL-5818    |
| NCI-H1355             | Adenocarcinoma | G13C      | E285K       | Q1159H       | ACL-4 | CRL-5865    |
| NCI-H1373             | Adenocarcinoma | G12C      | E339*       | Intron       | RPMI  | CRL-5866    |
| NCI-H1395             | Adenocarcinoma | x         | x           | x            | RPMI  | CRL-5868    |
| NCI-H1437             | Adenocarcinoma | x         | R267P       | x            | RPMI  | CRL-5872    |
| NCI-H1563             | Adenocarcinoma | x         | x           | x            | RPMI  | CRL-5875    |
| NCI-H1581             | Large cell     | x         | Q144*       | x            | ACL-4 | CRL-5878    |
| NCI-H1650             | Adenocarcinoma | x         | V225_splice | ELREA746del  | RPMI  | CRL-5883    |
| NCI-H1651             | Adenocarcinoma | x         | C176Y       | x            | ACL-4 | CRL-5884    |
| NCI-H1693             | Adenocarcinoma | x         | Q331_splice | x            | RPMI  | CRL-5887    |
| NCI-H1703             | Adenocarcinoma | x         | A307_splice | x            | RPMI  | CRL-5889    |
| NCI-H1792             | Adenocarcinoma | G12C      | E224_splice | x            | RPMI  | CRL-5895    |
| NCI-H1793             | Adenocarcinoma | x         | R209*       | C311F        | HITES | CRL-5896    |
| NCI-H1944             | Adenocarcinoma | G13D      | x           | x            | RPMI  | CRL-5907    |
| NCI-H1975             | Adenocarcinoma | x         | x           | T790M, L858R | RPMI  | CRL-5908    |
| NCI-H2009             | Adenocarcinoma | G12A      | R273L       | Intron       | HITES | CRL-5911    |
| NCI-H2030             | Adenocarcinoma | G12C      | G262V       | x            | RPMI  | CRL-5914    |
| NCI-H2085             | Adenocarcinoma | x         | ND          | ND           | ACL-4 | CRL-5921    |
| NCI-H2122             | Adenocarcinoma | G12C      | C176F, Q16L | x            | RPMI  | CRL-5985    |
| NCI-H2126             | Adenocarcinoma | x         | E62*        | x            | ACL-4 | CCL-256     |
| NCI-H23               | Adenocarcinoma | G12C      | M246I       | x            | RPMI  | CRL-5800    |
| NCI-H2405             | Adenocarcinoma | x         | x           | x            | ACL-4 | CRL-5944    |
| NCI-H322              | Adenocarcinoma | x         | R248L       | x            | RPMI  | CRL-5806    |
| NCI-H358              | Adenocarcinoma | G12C      | x           | x            | RPMI  | CRL-5807    |
| NCI-H441              | Adenocarcinoma | G12V      | R158L       | x            | RPMI  | HTB-174     |

| <b>Lung Cancer Cell Line</b> | <b>Subtype</b> | <b>K-Ras Mut</b> | <b>P53 Mut</b>         | <b>EGFR Mut</b>   | <b>Media</b> | <b>ATCC Number</b> |
|------------------------------|----------------|------------------|------------------------|-------------------|--------------|--------------------|
| NCI-H460                     | Large cell     | Q61H             | x                      | x                 | RPMI         | HTB-177            |
| NCI-H520                     | Squamous       | x                | W146*                  | x                 | RPMI         | HTB-182            |
| NCI-H522                     | Adenocarcinoma | x                | P191fs FRAME SHIFT DEL | x                 | RPMI         | CRL-5810           |
| NCI-H661                     | Large cell     | x                | R158L, S215I           | x                 | RPMI         | HTB-183            |
| NCI-H838                     | Adenocarcinoma | x                | x                      | x                 | RPMI         | CRL-5844           |
| HCC4006                      | Adenocarcinoma | x                | x                      | ELR746del INFRAME | RPMI         | CRL-2871           |
| SK-LU-1                      | Adenocarcinoma | G12D             | H193R                  | x                 | EMEM         | HTB-57             |
| SK-MES-1                     | Squamous       | x                | E298*                  | x                 | EMEM         | HTB-58             |
| SW 1573                      | Squamous       | G12C             | Intron                 | x                 | RPMI         | CRL-2170           |

Supplementary Table 2

| Breast Cancer Cell Line | Screen 1 | Screen 2 | Screen 3 | Screen 4 |
|-------------------------|----------|----------|----------|----------|
| AU565                   |          | x        | x        | x        |
| BT-20                   |          | x        | x        | x        |
| BT-474                  | x        | x        | x        | x        |
| BT-483                  |          | x        | x        | x        |
| BT-549                  | x        | x        | x        |          |
| CAMA-1                  |          | x        | x        | x        |
| HCC1143                 |          | x        | x        | x        |
| HCC1395                 |          | x        | x        | x        |
| HCC1419                 |          | x        | x        | x        |
| HCC1500                 |          | x        |          |          |
| HCC1569                 |          | x        | x        | x        |
| HCC1599                 |          | x        | x        |          |
| HCC1806                 |          | x        | x        | x        |
| HCC1937                 |          | x        | x        | x        |
| HCC1954                 |          | x        | x        | x        |
| HCC2218                 |          | x        | x        | x        |
| HCC38                   |          | x        | x        | x        |
| HCC70                   |          | x        | x        | x        |
| Hs 578T                 | x        | x        | x        | x        |
| JIMT-1                  |          | x        | x        | x        |
| MCF7                    | x        | x        | x        | x        |
| MDA-MB-134-VI           |          | x        | x        | x        |
| MDA-MB-157              |          | x        | x        | x        |
| MDA-MB-175-VII          |          | x        | x        | x        |
| MDA-MB-231              | x        | x        | x        | x        |
| MDA-MB-415              |          | x        | x        | x        |
| MDA-MB-436              |          | x        | x        | x        |
| MDA-MB-453              |          | x        | x        | x        |
| MDA-MB-468              |          | x        | x        | x        |
| MDA-MB-361              | x        | x        | x        |          |
| SK-BR-3                 |          | x        | x        | x        |
| T-47D                   | x        | x        | x        | x        |
| UACC-812                |          | x        | x        | x        |
| ZR-75-1                 |          | x        | x        | x        |
| ZR-75-30                |          | x        |          |          |

| Lung Cancer Cell Line | Screen 1 | Screen 2 |
|-----------------------|----------|----------|
| A549                  |          | X        |
| Calu-3                |          | X        |
| NCI-H1155             |          | X        |
| NCI-H1355             |          | X        |
| NCI-H1373             |          | X        |
| NCI-H1395             |          | X        |
| NCI-H1437             |          | X        |
| NCI-H1563             | x        | X        |
| NCI-H1581             | x        | x        |
| NCI-H1650             | x        | x        |
| NCI-H1651             |          | x        |
| NCI-H1693             |          | x        |
| NCI-H1703             |          | x        |
| NCI-H1792             |          | x        |
| NCI-H1793             |          | x        |
| NCI-H1944             | x        | x        |
| NCI-H1975             | x        | x        |
| NCI-H2009             |          | x        |
| NCI-H2030             |          | x        |
| NCI-H2085             |          | x        |
| NCI-H2122             |          | x        |
| NCI-H2126             |          | x        |
| NCI-H23               | x        | x        |
| NCI-H2405             |          | x        |
| NCI-H322              |          | x        |
| NCI-H358              |          | x        |
| NCI-H441              |          | x        |
| NCI-H460              |          | x        |
| NCI-H520              | x        | x        |
| NCI-H522              |          | x        |
| NCI-H661              | x        | x        |
| NCI-H838              |          | x        |
| HCC4006               | x        | x        |
| SK-LU-1               |          | x        |
| SK-MES-1              |          | x        |
| SW 1573               |          | x        |



Supplementary Table 3

| Position | Halistanol sulfate (mkh2-141-2) |                                           | Topsentinol L trisulfate (mkh2-141-4) |                                  |
|----------|---------------------------------|-------------------------------------------|---------------------------------------|----------------------------------|
|          | $\delta_C$ (mult.)              | $\delta_H$ (mult., J in Hz)               | $\delta_C$ (mult.)                    | $\delta_H$ (mult., J in Hz)      |
| 1        | 39.4                            | 2.07 (br d, 14.3)<br>1.48 (dd, 15.4, 2.9) | 39.4                                  | 2.07 (m)<br>1.48 (dd, 14.9, 3.7) |
| 2        | 75.7                            | 4.80 (s)                                  | 75.7                                  | 4.80 (s)                         |
| 3        | 75.6                            | 4.75 (s)                                  | 75.6                                  | 4.75 (br d, 22.3)                |
| 4        | 25.2                            | 2.28 (br d, 14.6)<br>1.79 (br t, 13.4)    | 25.2                                  | 2.28 (br d, 14.5)<br>1.78 (m)    |
| 5        | 45.5                            | 1.63 (m)                                  | 45.5                                  | 1.62 (m)                         |
| 6        | 78.9                            | 4.19 (td, 11.1, 4.4)                      | 78.9                                  | 4.19 (td, 11.1, 4.4)             |
| 7        | 40.2                            | 2.37 (dt, 12.2, 4.3)<br>1.05 (m)          | 40.2                                  | 2.36 (dt, 12.1, 4.3)<br>1.04 (m) |
| 8        | 35.3                            | 1.53 (m)                                  | 35.3                                  | 1.53 (m)                         |
| 9        | 56.0                            | 0.76 (m)                                  | 56.0                                  | 0.75 (m)                         |
| 10       | 37.8                            |                                           | 37.8                                  |                                  |
| 11       | 22.0                            | 1.54 (m)<br>1.31 (m)                      | 22.0                                  | 1.55 (m)<br>1.31 (m)             |
| 12       | 41.3                            | 2.00 (br d, 12.4)<br>1.15 (m)             | 41.2                                  | 2.00 (dt, 12.4, 2.9)<br>1.17 (m) |
| 13       | 43.9                            |                                           | 43.8                                  |                                  |
| 14       | 57.8                            | 1.11 (m)                                  | 57.8                                  | 1.11 (m)                         |
| 15       | 25.3                            | 1.63 (m)<br>1.11 (m)                      | 25.3                                  | 1.59 (m)<br>1.11 (m)             |
| 16       | 29.3                            | 1.86 (m)<br>1.29 (m)                      | 30.3                                  | 1.73 (m)<br>1.29 (m)             |
| 17       | 57.5                            | 1.16 (m)                                  | 57.5                                  | 1.19 (m)                         |
| 18       | 12.6                            | 0.69 (s)                                  | 12.8                                  | 0.71 (s)                         |
| 19       | 15.4                            | 1.05 (s)                                  | 15.4                                  | 1.05 (s)                         |
| 20       | 37.8                            | 1.38 (m)                                  | 42.2                                  | 2.06 (m)                         |
| 21       | 19.7                            | 0.94 (d)                                  | 21.9                                  | 1.05 (d, 7.2)                    |
| 22       | 36.8                            | 1.56 (m)<br>0.90 (m)                      | 140.8                                 | 5.14 (dd, 15.2, 8.5)<br>NA       |
| 23       | 29.4                            | 1.63 (m)<br>0.71 (m)                      | 128.5                                 | 5.05 (dd, 15.6, 9.5)<br>NA       |
| 24       | 45.5                            | 0.99 (m)                                  | 57.8                                  | 1.34 (m)                         |
| 25       | 34.2                            |                                           | 29.9 <sup>a</sup>                     | 1.70 (m) <sup>a</sup>            |
| 26       | 27.9                            | 0.86 (s)                                  | 22.3 <sup>a</sup>                     | 0.86 (dd, 6.6, 1.6) <sup>a</sup> |
| 27       | 27.9                            | 0.86 (s)                                  | 19.8 <sup>a</sup>                     | 0.80 (dd, 6.7, 4.7) <sup>a</sup> |
| 28       | 15.1                            | 0.83 (d)                                  | 29.9 <sup>b</sup>                     | 1.70 (m) <sup>b</sup>            |
| 29       | 27.9                            | 0.86 (s)                                  | 22.2 <sup>b</sup>                     | 0.86 (dd, 6.6, 1.6) <sup>b</sup> |
| 30       | NA                              | NA                                        | 19.6 <sup>b</sup>                     | 0.80 (dd, 6.7, 4.7) <sup>b</sup> |

<sup>a</sup> Chemical shifts cannot be distinguished from those denoted by <sup>b</sup>.

Supplementary Table 4

| Protein            | Paired TTEST | DMSO Av   | TLT Av  | Mean diff DMSO-M4 | % Change     |
|--------------------|--------------|-----------|---------|-------------------|--------------|
| 14-3-3-beta        | 0.297467434  | 0.1205898 | 0.17484 | -0.054254273      | 31.03008862  |
| 14-3-3-epsilon     | 0.127055041  | 0.0924194 | 0.08764 | 0.004775493       | -5.448744719 |
| 14-3-3-zeta        | 0.611359948  | 0.6997833 | 0.69274 | 0.007044538       | -1.016911279 |
| 4E-BP1             | 0.88102686   | 0.2872652 | 0.286   | 0.001265921       | -0.442630957 |
| 4E-BP1_pS65        | 0.688000793  | 0.6132918 | 0.60668 | 0.006608546       | -1.089290952 |
| 4E-BP1_pT37_T46    | 0.052849589  | 0.7249001 | 0.83875 | -0.11385355       | 13.57413446  |
| 53BP1              | 0.129295665  | 0.4471605 | 0.50738 | -0.060216947      | 11.86827429  |
| ACC_pS79           | 0.023981823  | 0.6414503 | 0.51904 | 0.122410764       | -23.5840916  |
| ACC1               | 0.057831968  | 0.7090081 | 0.66169 | 0.047320333       | -7.151459425 |
| ACVRL1             | 0.204285214  | 0.0932188 | 0.09812 | -0.004902111      | 4.995992268  |
| ADAR1              | 0.722298854  | 0.1220255 | 0.12328 | -0.001252066      | 1.015647984  |
| Akt                | 0.019548209  | 0.572984  | 0.52345 | 0.04953045        | -9.462243974 |
| Akt_pS473          | 0.956418547  | 0.3849057 | 0.38686 | -0.001955655      | 0.505518217  |
| Akt_pT308          | 0.848831423  | 1.0898163 | 1.07076 | 0.019051852       | -1.779275781 |
| AMPK-alpha         | 0.494529968  | 0.8115008 | 0.82971 | -0.01821201       | 2.194977551  |
| AMPK-alpha_pT172   | 0.030926158  | 0.2468539 | 0.18237 | 0.06448569        | -35.360163   |
| Annexin-I          | 0.202592026  | 0.2944506 | 0.35136 | -0.056913782      | 16.19793713  |
| Annexin-VII        | 0.479745507  | 0.1808896 | 0.19652 | -0.015631946      | 7.954316733  |
| AR                 | 0.086105524  | 0.1613788 | 0.15309 | 0.008291424       | -5.416139865 |
| A-Raf              | 0.021802658  | 0.3242939 | 0.30103 | 0.023259764       | -7.726620108 |
| ARHI               | 0.374227021  | 0.0561487 | 0.0545  | 0.001644846       | -3.017852599 |
| ATM                | 0.310104666  | 0.1761461 | 0.17153 | 0.004614255       | -2.690027967 |
| ATM_pS1981         | 0.937022455  | 0.0777696 | 0.07816 | -0.000390239      | 0.499282649  |
| ATP5H              | 0.186610373  | 0.0743909 | 0.07776 | -0.003372651      | 4.337059112  |
| ATR                | 0.92837797   | 0.2607643 | 0.26007 | 0.000696483       | -0.26780838  |
| Bad_pS112          | 0.010420165  | 0.4945067 | 0.55515 | -0.060640319      | 10.9232895   |
| Bak                | 0.008721632  | 0.1909752 | 0.2054  | -0.0144239        | 7.022377178  |
| BAP1               | 0.259977565  | 0.2223549 | 0.21511 | 0.007244081       | -3.367604315 |
| Bax                | 0.343854359  | 0.3507281 | 0.36731 | -0.016583733      | 4.514891461  |
| b-Catenin          | 0.584632507  | 0.6792402 | 0.71601 | -0.036766439      | 5.134930087  |
| b-Catenin_pT41_S45 | 0.070481607  | 0.1303322 | 0.13996 | -0.009625835      | 6.877656406  |
| Bcl2               | 0.422689711  | 0.0737728 | 0.07546 | -0.001686947      | 2.235559768  |
| Bcl-xL             | 0.13933645   | 0.5464368 | 0.57938 | -0.032944392      | 5.68613386   |
| Beclin             | 0.302512426  | 0.1887283 | 0.22117 | -0.032440994      | 14.66794427  |
| Bid                | 0.654051893  | 0.2214305 | 0.22455 | -0.003117031      | 1.388138801  |
| Bim                | 0.601368016  | 0.5163407 | 0.53035 | -0.014011711      | 2.641962346  |
| B-Raf              | 0.032395628  | 1.009608  | 0.94963 | 0.059981572       | -6.316333569 |
| B-Raf_pS445        | 0.778696211  | 0.1716865 | 0.17297 | -0.001285076      | 0.742940326  |
| BRCA2              | 0.634796435  | 0.1778776 | 0.18588 | -0.008002506      | 4.305198123  |
| Caspase-7-cleaved  | 0.199719195  | 0.0678278 | 0.07255 | -0.004718936      | 6.504683391  |
| Caspase-8          | 0.111844814  | 0.3088891 | 0.29177 | 0.017117839       | -5.866869961 |
| Caveolin-1         | 0.330102248  | 0.454963  | 0.44035 | 0.014615083       | -3.31898519  |
| CD29               | 0.347436034  | 0.031597  | 0.03009 | 0.001504719       | -5.00034688  |
| CD31               | 0.027495297  | 0.0240145 | 0.02141 | 0.002608377       | -12.18521243 |

| Protein            | Paired TTEST | DMSO Av   | TLT Av  | Mean diff DMSO-M4 | % Change     |
|--------------------|--------------|-----------|---------|-------------------|--------------|
| CD49b              | 0.000681184  | 0.090206  | 0.08321 | 0.006999799       | -8.412591597 |
| CDK1               | 0.527951409  | 0.2966172 | 0.30303 | -0.006412135      | 2.116011117  |
| Chk1               | 0.517023385  | 0.4436631 | 0.43806 | 0.005598172       | -1.277931995 |
| Chk1_pS345         | 0.012431443  | 0.2876721 | 0.24789 | 0.039780631       | -16.0476008  |
| Chk2               | 0.900777361  | 0.3054057 | 0.30321 | 0.002196345       | -0.724366013 |
| Chk2_pT68          | 0.234845145  | 0.1516815 | 0.15712 | -0.005434188      | 3.458717341  |
| c-Jun_pS73         | 0.039255625  | 0.2882244 | 0.34707 | -0.058847805      | 16.95549391  |
| c-Kit              | 0.137841447  | 0.1486842 | 0.15822 | -0.009531557      | 6.024403154  |
| Claudin-7          | 0.838258667  | 0.5496062 | 0.53524 | 0.014368512       | -2.684510622 |
| c-Met              | 0.100343269  | 0.149599  | 0.14234 | 0.007259813       | -5.100362748 |
| c-Met_pY1234_Y1235 | 0.607157419  | 0.1791378 | 0.1818  | -0.002660777      | 1.463584969  |
| c-Myc              | 0.823539509  | 0.3123089 | 0.3083  | 0.00400808        | -1.300054814 |
| Collagen-VI        | 0.581827632  | 0.1085949 | 0.09859 | 0.010000297       | -10.14284249 |
| Complex-II-Subunit | 0.019357592  | 0.4883395 | 0.5321  | -0.043759206      | 8.223889209  |
| Cox2               | 0.267016058  | 0.1049197 | 0.17838 | -0.073460635      | 41.18203035  |
| Cox-IV             | 0.21180139   | 0.0470478 | 0.04401 | 0.003040435       | -6.908917587 |
| C-Raf              | 0.00569841   | 0.2922268 | 0.26106 | 0.031170474       | -11.94013341 |
| C-Raf_pS338        | 0.181233222  | 0.4905809 | 0.45703 | 0.033551782       | -7.341279215 |
| Cyclin-B1          | 0.047649153  | 1.5024802 | 1.70111 | -0.19862495       | 11.67622972  |
| Cyclin-D1          | 0.255149632  | 0.3947857 | 0.37585 | 0.018939256       | -5.039094233 |
| Cyclin-E1          | 0.471229306  | 0.3046325 | 0.2948  | 0.009828166       | -3.333793248 |
| Cyclophilin-F      | 0.588089846  | 1.2412809 | 1.12366 | 0.117620772       | -10.4676463  |
| DJ1                | 0.057596359  | 0.3065183 | 0.31909 | -0.012574353      | 3.940658557  |
| Dvl3               | 0.305796393  | 0.3631395 | 0.35437 | 0.008770662       | -2.475009209 |
| E2F1               | 0.465992121  | 0.0490497 | 0.05045 | -0.001399862      | 2.774776277  |
| E-Cadherin         | 0.414543231  | 0.2309039 | 0.26116 | -0.030252555      | 11.58407426  |
| eEF2               | 0.024329272  | 0.4482607 | 0.42437 | 0.023888806       | -5.629214761 |
| eEF2K              | 0.019692069  | 0.5732332 | 0.5177  | 0.055530627       | -10.72635653 |
| EGFR               | 0.694306782  | 0.6800515 | 0.66891 | 0.011142733       | -1.665807521 |
| EGFR_pY1068        | 0.28897535   | 0.0780788 | 0.09203 | -0.013946575      | 15.15514849  |
| EGFR_pY1173        | 0.30499704   | 0.1638452 | 0.17395 | -0.010102281      | 5.80766297   |
| eIF4E              | 0.125804471  | 0.8195001 | 0.79346 | 0.026037641       | -3.28152156  |
| eIF4G              | 0.878724419  | 1.035565  | 1.03183 | 0.003731644       | -0.361651783 |
| ER-alpha           | 0.504178772  | 0.0388962 | 0.0377  | 0.001192711       | -3.163397879 |
| ER-alpha_pS118     | 0.634911633  | 0.3953871 | 0.39946 | -0.004070958      | 1.019120408  |
| ERCC1              | 0.007891293  | 0.1646311 | 0.19196 | -0.02732517       | 14.23510243  |
| Ets-1              | 0.436109849  | 0.2073012 | 0.20972 | -0.002419888      | 1.153860178  |
| FAK                | 0.00596371   | 0.3746999 | 0.35153 | 0.023166155       | -6.590023246 |
| FAK_pY397          | 0.080659613  | 0.0997996 | 0.08071 | 0.019094485       | -23.65957935 |
| FASN               | 0.010279931  | 0.7383777 | 0.68099 | 0.057383377       | -8.426410979 |
| Fibronectin        | 0.287511878  | 0.0348751 | 0.03279 | 0.002080442       | -6.34384711  |
| FoxM1              | 0.021099513  | 0.466201  | 0.42671 | 0.039490719       | -9.254691723 |
| FoxO3a             | 0.551797236  | 0.1353121 | 0.1374  | -0.002085824      | 1.518089719  |
| FoxO3a_pS318_S321  | 0.943894769  | 0.5589604 | 0.56027 | -0.001312249      | 0.234216082  |
| G6PD               | 0.228099421  | 0.0796185 | 0.07617 | 0.003448534       | -4.52742041  |

| Protein           | Paired TTEST | DMSO Av   | TLT Av  | Mean diff DMSO-M4 | % Change     |
|-------------------|--------------|-----------|---------|-------------------|--------------|
| Gab2              | 0.129420955  | 0.2553089 | 0.24282 | 0.012488801       | -5.143232028 |
| GAPDH             | 0.076587901  | 0.511228  | 0.41902 | 0.092207104       | -22.00536928 |
| GATA3             | 0.444543139  | 0.2890905 | 0.27977 | 0.009317527       | -3.330389022 |
| GCN5L2            | 0.581933997  | 0.4024414 | 0.41069 | -0.008251661      | 2.009204067  |
| GPBB              | 0.693848285  | 0.2242394 | 0.23134 | -0.00710235       | 3.070067796  |
| GSK-3ab           | 0.107780308  | 0.8094326 | 0.82645 | -0.017016942      | 2.059041866  |
| GSK-3ab_pS21_S9   | 0.550735827  | 0.6241206 | 0.64794 | -0.023816819      | 3.675790205  |
| GSK-3b_pS9        | 0.177310106  | 0.4761323 | 0.5083  | -0.03216499       | 6.327988207  |
| Gys               | 0.995834943  | 0.518761  | 0.51881 | -5.10903E-05      | 0.009847553  |
| Gys_pS641         | 0.541992189  | 0.3732588 | 0.36622 | 0.007043452       | -1.923308627 |
| HER2              | 0.263192338  | 0.0281805 | 0.02605 | 0.002128034       | -8.16827614  |
| HER2_pY1248       | 0.104377998  | 0.0403153 | 0.04791 | -0.0075911        | 15.8456832   |
| HER3              | 0.192076665  | 0.2256087 | 0.20685 | 0.018756371       | -9.06751822  |
| HER3_pY1289       | 0.334961404  | 0.3471657 | 0.33777 | 0.009395071       | -2.781494189 |
| Heregulin         | 0.356306262  | 0.158463  | 0.16414 | -0.005672826      | 3.456177062  |
| HIAP              | 0.418473854  | 0.4569881 | 0.44928 | 0.00770568        | -1.715108173 |
| Histone-H3        | 0.859920263  | 0.1358833 | 0.13816 | -0.002276057      | 1.647415041  |
| IGF1R-beta        | 0.633604069  | 0.2032754 | 0.20619 | -0.002917845      | 1.415102345  |
| IGFBP2            | 0.004643877  | 0.1284908 | 0.19396 | -0.065470005      | 33.7542394   |
| INPP4b            | 0.224786181  | 0.1661943 | 0.16219 | 0.004006157       | -2.470067174 |
| IRS1              | 0.149211343  | 0.6053276 | 0.58946 | 0.015868518       | -2.692047293 |
| JAB1              | 0.551441944  | 0.0690752 | 0.06787 | 0.001201038       | -1.769508052 |
| JNK_pT183_Y185    | 0.622517253  | 0.1801214 | 0.18676 | -0.006641022      | 3.555867298  |
| JNK2              | 0.620583516  | 0.4413883 | 0.43619 | 0.005199641       | -1.192062542 |
| Lck               | 0.404041823  | 0.1615087 | 0.15269 | 0.008820444       | -5.776766198 |
| MAPK_pT202_Y204   | 0.063897497  | 0.3657461 | 0.27199 | 0.09375541        | -34.47007848 |
| Mcl-1             | 0.869330062  | 0.3021391 | 0.30475 | -0.002608929      | 0.856093758  |
| MDM2_pS166        | 0.184798884  | 0.4228332 | 0.43978 | -0.016949566      | 3.854077221  |
| MEK1              | 0.749093243  | 0.4931058 | 0.48759 | 0.005517333       | -1.131555193 |
| MEK1_pS217_S221   | 0.330871457  | 0.4264982 | 0.40648 | 0.020019075       | -4.924994372 |
| MEK2              | 0.046725637  | 0.262228  | 0.24935 | 0.012881695       | -5.166185233 |
| Merlin            | 0.110425164  | 0.6224777 | 0.57406 | 0.048420054       | -8.434701674 |
| MIG6              | 0.65818707   | 0.2714421 | 0.26646 | 0.004981295       | -1.869428612 |
| MSH2              | 0.232864132  | 0.7096262 | 0.69032 | 0.019305584       | -2.796611216 |
| MSH6              | 0.353124034  | 0.8008488 | 0.8208  | -0.019953461      | 2.43097042   |
| mTOR              | 0.10247673   | 1.0000496 | 0.97459 | 0.025457724       | -2.612141883 |
| mTOR_pS2448       | 0.535634771  | 0.5736505 | 0.58052 | -0.006872585      | 1.183860668  |
| Myosin-11         | 0.130662479  | 0.2516351 | 0.24104 | 0.010593952       | -4.3950794   |
| Myosin-IIa_pS1943 | 0.136330833  | 0.5590272 | 0.52052 | 0.038505586       | -7.397499919 |
| NAPSIN-A          | 0.000244622  | 0.1888714 | 0.1789  | 0.009967334       | -5.571328945 |
| N-Cadherin        | 0.115979527  | 0.108239  | 0.0995  | 0.008736554       | -8.780236006 |
| NDRG1_pT346       | 0.168014205  | 0.3168807 | 0.37585 | -0.05897111       | 15.68998963  |
| NF-kB-p65_pS536   | 0.700093069  | 0.5674735 | 0.54107 | 0.026404604       | -4.880082075 |
| Notch1            | 0.661226615  | 0.6396916 | 0.65434 | -0.01464397       | 2.237990814  |
| N-Ras             | 0.424040717  | 0.0373128 | 0.03559 | 0.001720188       | -4.83299624  |

| Protein           | Paired TTEST | DMSO Av   | TLT Av  | Mean diff DMSO-M4 | % Change     |
|-------------------|--------------|-----------|---------|-------------------|--------------|
| p16INK4a          | 0.089057378  | 0.2589195 | 0.24097 | 0.017949144       | -7.448692453 |
| p21               | 0.072152138  | 0.589791  | 0.68726 | -0.09746523       | 14.18179013  |
| p27_pT157         | 0.628732156  | 0.4132618 | 0.42135 | -0.008085064      | 1.918861914  |
| p27_pT198         | 0.015523921  | 0.380493  | 0.4207  | -0.040209916      | 9.557793229  |
| p27-Kip-1         | 0.101448071  | 0.1353413 | 0.12438 | 0.010959469       | -8.811151583 |
| p38               | 0.03267437   | 0.8570567 | 0.8278  | 0.029257917       | -3.534423672 |
| p38_pT180_Y182    | 0.002755169  | 0.4029123 | 0.52386 | -0.120951629      | 23.08836548  |
| p38-alpha         | 0.00774209   | 0.3541716 | 0.32024 | 0.033932183       | -10.59587949 |
| p53               | 0.314234566  | 0.0975719 | 0.09485 | 0.002724253       | -2.872240696 |
| p70-S6K_pT389     | 0.031044202  | 0.1669332 | 0.14084 | 0.026097196       | -18.53020434 |
| p70-S6K1          | 0.172006967  | 0.2027094 | 0.1965  | 0.006210831       | -3.160751165 |
| PAI-1             | 0.360871698  | 0.7728393 | 0.79675 | -0.02391276       | 3.001280111  |
| PARP1             | 0.967407249  | 2.6880892 | 2.69449 | -0.006399885      | 0.237517567  |
| PARP-cleaved      | 0.118830095  | 0.0705842 | 0.06733 | 0.00325635        | -4.836555963 |
| Paxillin          | 0.906536745  | 0.5151816 | 0.51694 | -0.001762799      | 0.341003507  |
| PCNA              | 0.06253059   | 0.2458135 | 0.23039 | 0.015419488       | -6.692659587 |
| Pdcd-1L1          | 0.112960284  | 0.1537748 | 0.21549 | -0.061714605      | 28.63927851  |
| Pdcd4             | 0.2306148    | 0.4398906 | 0.47403 | -0.034134929      | 7.201073805  |
| PDGFR-beta        | 0.638238272  | 0.7599954 | 0.79413 | -0.034136002      | 4.298533004  |
| PDK1              | 0.004328426  | 0.1989206 | 0.17397 | 0.024949699       | -14.34130609 |
| PDK1_pS241        | 0.010023724  | 0.4803055 | 0.44315 | 0.037151425       | -8.38341026  |
| PEA-15            | 0.575925151  | 0.4603699 | 0.4734  | -0.013030284      | 2.752488295  |
| PEA-15_pS116      | 0.07112505   | 0.4775941 | 0.51308 | -0.035485327      | 6.91614747   |
| PI3K-p110-alpha   | 0.045315699  | 0.3424673 | 0.32277 | 0.019699858       | -6.103421879 |
| PI3K-p85          | 0.209222646  | 0.2749676 | 0.27946 | -0.004493387      | 1.607876193  |
| PKC-alpha         | 0.896269303  | 0.7304674 | 0.7277  | 0.002768541       | -0.380451526 |
| PKC-alpha_pS657   | 0.795719345  | 0.4284552 | 0.43106 | -0.002602363      | 0.603716011  |
| PKC-beta-II_pS660 | 0.425784911  | 0.7686049 | 0.80879 | -0.040182907      | 4.968287878  |
| PKC-delta_pS664   | 0.045976568  | 0.3448394 | 0.36918 | -0.024340036      | 6.593008843  |
| PMS2              | 0.025956644  | 0.801951  | 0.74703 | 0.054920915       | -7.351901528 |
| Porin             | 0.243883965  | 0.0857229 | 0.08904 | -0.003322         | 3.730702144  |
| PR                | 0.663238212  | 0.1169763 | 0.11619 | 0.000789801       | -0.679769967 |
| PRAS40_pT246      | 0.365275156  | 0.8290985 | 0.86475 | -0.035650351      | 4.122624665  |
| PREX1             | 0.101304994  | 0.1049792 | 0.09812 | 0.006861336       | -6.992955773 |
| PTEN              | 0.782392774  | 0.1851321 | 0.18314 | 0.001988066       | -1.085520762 |
| Rab11             | 0.858096277  | 0.0879305 | 0.08734 | 0.000591986       | -0.677806514 |
| Rab25             | 0.332786784  | 0.1389058 | 0.13712 | 0.001783779       | -1.300869619 |
| Rad50             | 0.960424116  | 0.4113952 | 0.41097 | 0.000428285       | -0.104213934 |
| Rad51             | 0.024369829  | 0.1550382 | 0.13781 | 0.017233102       | -12.50541433 |
| Raptor            | 0.79377184   | 0.762859  | 0.75543 | 0.007433942       | -0.984074094 |
| Rb                | 0.533730146  | 0.2241153 | 0.2198  | 0.004313551       | -1.962473631 |
| Rb_pS807_S811     | 0.457540895  | 1.1841248 | 1.11809 | 0.066029881       | -5.90557026  |
| RBM15             | 0.957138438  | 0.4360402 | 0.43545 | 0.000592611       | -0.13609247  |
| Rictor            | 0.689051732  | 0.6479663 | 0.6408  | 0.007167023       | -1.11845059  |
| Rictor_pT1135     | 0.017269911  | 0.6853876 | 0.62371 | 0.061679537       | -9.889167527 |

| Protein          | Paired TTEST | DMSO Av   | TLT Av  | Mean diff DMSO-M4 | % Change     |
|------------------|--------------|-----------|---------|-------------------|--------------|
| RSK              | 0.147394136  | 0.4682432 | 0.45481 | 0.013431948       | -2.953301246 |
| S6_pS235_S236    | 0.09647995   | 1.2531184 | 1.40306 | -0.149946424      | 10.68706343  |
| S6_pS240_S244    | 0.118730496  | 0.8496313 | 0.94022 | -0.090591207      | 9.635081836  |
| SCD              | 0.759737499  | 0.0673423 | 0.06663 | 0.000707615       | -1.061931555 |
| SETD2            | 0.041455038  | 0.1748269 | 0.16728 | 0.007542015       | -4.508486479 |
| SF2              | 0.082190928  | 0.0562108 | 0.05337 | 0.002836706       | -5.314761793 |
| Shc_pY317        | 0.413441153  | 0.3421638 | 0.33226 | 0.009902927       | -2.980467043 |
| Smac             | 0.20574698   | 0.4343177 | 0.36964 | 0.064677673       | -17.4974742  |
| Smad1            | 0.109784621  | 0.2190075 | 0.20699 | 0.012015241       | -5.804681259 |
| Smad3            | 0.042150885  | 0.5352521 | 0.5145  | 0.020756397       | -4.034318757 |
| Smad4            | 0.109781972  | 0.1975331 | 0.18686 | 0.01066866        | -5.709304748 |
| Snail            | 0.021853524  | 0.2435867 | 0.32022 | -0.076637945      | 23.93255874  |
| Src              | 0.921787018  | 0.2637837 | 0.26281 | 0.000976124       | -0.371421462 |
| Src_pY416        | 0.208694232  | 0.1672131 | 0.15217 | 0.015041977       | -9.884909758 |
| Src_pY527        | 0.10778136   | 0.700054  | 0.642   | 0.05805016        | -9.042026273 |
| Stat3_pY705      | 0.061361639  | 0.288247  | 0.23968 | 0.048567263       | -20.26340212 |
| Stat5a           | 0.004748425  | 0.5811547 | 0.52104 | 0.060117804       | -11.53810864 |
| Stathmin-1       | 0.452980835  | 0.1374042 | 0.14212 | -0.004714313      | 3.317171496  |
| Syk              | 0.804047646  | 0.2295709 | 0.22859 | 0.000979491       | -0.428489726 |
| TAZ              | 0.293525898  | 0.4116032 | 0.58673 | -0.175121832      | 29.8473411   |
| TFRC             | 0.45006093   | 0.5982809 | 0.62051 | -0.022225227      | 3.581790061  |
| TIGAR            | 0.203513955  | 0.4447832 | 0.43667 | 0.008111844       | -1.857654354 |
| Transglutaminase | 0.347628428  | 0.3099899 | 0.31823 | -0.008237679      | 2.588612494  |
| TSC1             | 0.724792685  | 0.6995556 | 0.70621 | -0.006652592      | 0.942015755  |
| TTF1             | 0.072765875  | 0.4216622 | 0.40529 | 0.016367572       | -4.038438288 |
| Tuberin          | 0.007348867  | 1.2912628 | 1.17141 | 0.119849468       | -10.23118546 |
| Tuberin_pT1462   | 0.472275507  | 0.3208728 | 0.30659 | 0.014281069       | -4.658009245 |
| TWIST            | 0.026724298  | 0.0787599 | 0.07013 | 0.00863235        | -12.30950185 |
| Tyro3            | 0.148506776  | 0.2903453 | 0.26374 | 0.026606514       | -10.08820479 |
| UBAC1            | 0.084205337  | 0.4482809 | 0.42428 | 0.023999931       | -5.656613047 |
| UGT1A            | 0.129590932  | 0.0798728 | 0.07732 | 0.002550457       | -3.298473152 |
| UQCRC2           | 0.968988613  | 0.097701  | 0.09758 | 0.000124445       | -0.127535891 |
| VEGFR-2          | 0.399973553  | 0.4634747 | 0.45786 | 0.005619443       | -1.227340541 |
| XRCC1            | 0.599402963  | 0.4539372 | 0.45771 | -0.003775075      | 0.824770285  |
| YAP              | 0.389819715  | 0.3792817 | 0.38599 | -0.006706443      | 1.737473896  |
| YAP_pS127        | 0.786380304  | 0.7320844 | 0.73928 | -0.007192785      | 0.972948256  |
| YB1              | 0.055196453  | 0.6676773 | 0.7363  | -0.068626495      | 9.320405293  |
| YB1_pS102        | 0.019015082  | 0.6649866 | 0.78032 | -0.11532871       | 14.77975748  |

Supplementary Table 5

| Cell Line  | Topsentinol L Trisulfate EC50 ( $\mu\text{M}$ ) |       |       |           |
|------------|-------------------------------------------------|-------|-------|-----------|
|            | GFP                                             | AMPK  | CHK1  | AMPK+CHK1 |
| HCC1143    | 147.37                                          | 73.35 | 46.60 | 82.49     |
| MDA-MB-436 | 88.80                                           | 81.74 | 61.86 | 57.34     |
